# Supplementary material for: Prevalence and risk factors associated with prehypertension in Shunde District, southern China
Source: PubMed Central journal article supplement — BMJ Open. 2014 Nov 13;4(11):e006551. doi: 10.1136/bmjopen-2014-006551 (PMC4244395; doi:10.1136/bmjopen-2014-006551), 2014-11-13
Supplement: bmjopen-2014-006551.draft_revisions.pdf [file bmjopen-2014-006551.draft_revisions.pdf]

# BMJ Open

## Prevalence and Risk Factors Associated with Prehypertension in Shunde District, Southern China

|                                 |                                                                                                                                                                                                                                                                                                                                                                                                                                                                                                                                                                                                                                                                                                |
|---------------------------------|------------------------------------------------------------------------------------------------------------------------------------------------------------------------------------------------------------------------------------------------------------------------------------------------------------------------------------------------------------------------------------------------------------------------------------------------------------------------------------------------------------------------------------------------------------------------------------------------------------------------------------------------------------------------------------------------|
| Journal:                        | <i>BMJ Open</i>                                                                                                                                                                                                                                                                                                                                                                                                                                                                                                                                                                                                                                                                                |
| Manuscript ID:                  | bmjopen-2014-006551                                                                                                                                                                                                                                                                                                                                                                                                                                                                                                                                                                                                                                                                            |
| Article Type:                   | Research                                                                                                                                                                                                                                                                                                                                                                                                                                                                                                                                                                                                                                                                                       |
| Date Submitted by the Author:   | 04-Sep-2014                                                                                                                                                                                                                                                                                                                                                                                                                                                                                                                                                                                                                                                                                    |
| Complete List of Authors:       | Huang, Yuli; Nanfang Hospital, Southern Medical University, Cardiology<br>Qiu, Wenke; the First People's Hospital of Shunde, Health Management Center<br>Liu, Changhua; Nanfang Hospital, Southern Medical University, Cardiology<br>Zhu, Dingji; Nanfang Hospital, Southern Medical University, Cardiology<br>Hua, Jinghai; Nanfang Hospital, Southern Medical University, Cardiology<br>Cai, Xiaoyan; the First People's Hospital of Shunde, Foshan, Cardiology<br>Wu, Yanxian; the First People's Hospital of Shunde, Foshan, Cardiology<br>Hu, Yunzhao; the First People's Hospital of Shunde, Foshan, Cardiology<br>Xu, Dingli; Nanfang Hospital, Southern Medical University, Cardiology |
| <b>Primary Subject Heading</b>: | Epidemiology                                                                                                                                                                                                                                                                                                                                                                                                                                                                                                                                                                                                                                                                                   |
| Secondary Subject Heading:      | Cardiovascular medicine, Global health, Public health                                                                                                                                                                                                                                                                                                                                                                                                                                                                                                                                                                                                                                          |
| Keywords:                       | Cardiac Epidemiology < CARDIOLOGY, Hypertension < CARDIOLOGY, EPIDEMIOLOGY                                                                                                                                                                                                                                                                                                                                                                                                                                                                                                                                                                                                                     |
|                                 |                                                                                                                                                                                                                                                                                                                                                                                                                                                                                                                                                                                                                                                                                                |

SCHOLARONE™  
Manuscripts

only

1  
2  
3  
4 **Prevalence and Risk Factors Associated with Prehypertension in**  
5  
6  
7 **Shunde District, Southern China**  
8  
9

10  
11 Running head: Prevalence and Risk Factors of Prehypertension  
12  
13

14  
15  
16 Yuli Huang,<sup>1,2\*</sup> Wenke Qiu,<sup>3\*</sup> Changhua Liu,<sup>1</sup> Dingji Zhu,<sup>1</sup> Jinghai Hua,<sup>1</sup> Xiaoyan  
17  
18 Cai,<sup>2</sup> Yanxian Wu,<sup>2</sup> Yunzhao Hu,<sup>2</sup> Dingli Xu<sup>1</sup>  
19

20  
21 <sup>1</sup> Department of Cardiology, Nanfang Hospital, Southern Medical University,  
22  
23 Guangzhou, PR China; <sup>2</sup> Department of Cardiology, the First People's Hospital of  
24  
25 Shunde, Foshan, PR China; <sup>3</sup> Department of Health Management Center, the First  
26  
27 People's Hospital of Shunde, PR China  
28  
29  
30  
31

32  
33 \* The authors contributed equally to this work  
34  
35

36 Corresponding author: Professor Dingli Xu. Department of Cardiology, Nanfang  
37  
38 Hospital, Southern Medical University, Guangzhou, PR China. Tel.: + 86 20  
39  
40 61641503 Fax: + 86 20 87705671 E-mail: [dinglixu@fimmu.com](mailto:dinglixu@fimmu.com) Or Professor  
41  
42 Yunzhao Hu, Department of Cardiology, the First People's Hospital of Shunde,  
43  
44 Foshan, PR China. Tel.: + 86 757 22318680 Fax: + 86 757 22223899 E-mail:  
45  
46  
47 [huyunzhao4406@163.com](mailto:huyunzhao4406@163.com)  
48  
49  
50  
51  
52  
53  
54  
55  
56  
57  
58  
59  
60

**ABSTRACT**

**OBJECTIVE:** To explore the incidence and combined cardiovascular risk factors of prehypertension in southern China.

**DESIGN:** A cross-sectional study; the logistic regression model was used to find the risk factors of prehypertension.

**SETTING:** The study was conducted in Shunde District, Southern China, using the community-based health checkup information.

**PARTICIPANTS:** Subjects aged  $\geq 35$  years with complete health checkup information data between January 2011 and December 2013 were enrolled and divided into hypertension, prehypertension, and optimal blood pressure (BP). Prehypertension was further divided into low-range (BP 120-129/80-84 mmHg) and high-range (BP 130-139/85-89 mmHg) subgroups.

**OUTCOME MEASURES:** The prevalence of prehypertension and the combined cardiovascular risk factors within the prehypertensive subgroups.

**RESULTS:** Of the 5,362 initially reviewed cases (aged  $\geq 35$  years), 651 cases were excluded because of missing data. The proportions of optimal BP, prehypertension, and hypertension were 39.1%, 38.6%, and 22.3%, respectively. The average age, proportion of male sex, overweight, impaired fasting glucose (IFG), dyslipidemia, and hyperuricemia were significantly higher in the prehypertension group than in the optimal BP group (all  $P < 0.05$ ). Compared with low-range prehypertension, the proportions of overweight, dyslipidemia, and IFG were higher in the high-range prehypertension group (all  $P < 0.05$ ). Multivariate logistic regression analysis showed that overweight [odds ratio (OR) = 2.89, 95% confidence interval (CI) = 1.56–5.35], male sex (OR = 2.15, 95% CI = 1.37–3.37), and hyperuricemia (OR = 1.69, 95% CI = 1.18–2.64) were independent risk factors of prehypertension.

1  
2  
3 **CONCLUSIONS:** Prehypertension is highly prevalent in southern China.  
4  
5 Prehypertensive individuals presented with many other cardiovascular risk factors.  
6  
7 There was heterogeneity of combined risk factors within the prehypertensive  
8  
9 subgroups.  
10

11 **Keywords:** Prehypertension; Prevalence; Risk Factors  
12  
13  
14  
15  
16  
17  
18  
19  
20  
21  
22  
23  
24  
25  
26  
27  
28  
29  
30  
31  
32  
33  
34  
35  
36  
37  
38  
39  
40  
41  
42  
43  
44  
45  
46  
47  
48  
49  
50  
51  
52  
53  
54  
55  
56  
57  
58  
59  
60

### Strengths and limitations of this study

- This study first documented prehypertension is highly prevalent in the Shunde District, southern China.
- With the economic development and lifestyle changes in China, obesity/overweight has become a very important risk factor for increased blood pressure.
- This is the first study to show that there was a significant heterogeneity of combined risk factors within the prehypertensive subgroups.
- Some important confounding factors possibly associated with increased blood pressure were not evaluated in the present study.

## Introduction

In 2003, the seventh report of the Joint National Committee on Prevention, Detection, Evaluation, and Treatment of High Blood Pressure (JNC 7) proposed a new blood pressure (BP) category, including 120–139 mmHg systolic blood pressure (SBP) or 80–89 mmHg diastolic blood pressure (DBP), designated as “prehypertension”.<sup>1</sup> The incidence of prehypertension is up to 30–50% worldwide, as well as in many districts of China.<sup>2-4</sup> It is known that in China, the incidence of hypertension is significantly higher in the northern than that in the southern area because of the colder climate and high-sodium intake.<sup>5</sup> Such regional factors may also affect the incidence of prehypertension. However, the incidence of prehypertension in Guangdong Province, southern China has been rarely reported.

Prehypertensive individuals are prone to progress into frank hypertension, and most of them present with clustering of other cardiovascular risk factors.<sup>6-8</sup> However, the term of “prehypertension” has been contentious. Most arguments against using this term consist of the possible public anxiety and overtreatment it may cause. Further, there is a high heterogeneity within this category because the risk of progressing to hypertension and developing cardiovascular disease is higher among people with BP 130–139/85–89 mmHg than among those with BP 120–129/80–84 mmHg.<sup>6, 9</sup> Furthermore, whether the concurrent cardiovascular risk factors in subgroups of prehypertension are different remains unanswered.

Given these inconsistent results, we conducted a retrospective analysis to explore the prevalence of prehypertension, and the cardiovascular risk factors in the

1  
2  
3 sub-groups of prehypertension in Guangdong Province, southern China.  
4  
5  
6  
7

## 8 **Methods**

### 9 **Study Participants**

10  
11  
12 We performed a retrospective study in Shunde District, a traditional but  
13  
14 economically developed district of Guangdong Province, in China, using the  
15  
16 community-based health checkup information. Community-based health checkup  
17  
18 information was collected in the Health Management Center of the First People's  
19  
20 Hospital of Shunde. The centers provided data for participants who enrolled in their  
21  
22 health checkup programs conducted between January 2011 and December 2013.  
23  
24 Subjects aged  $\geq 35$  years with complete data for the following characteristics were  
25  
26 included in this study: age, sex, smoking/drinking habits, history of chronic diseases  
27  
28 and treatment, family history of hypertension, height, weight, BP, fasting plasma  
29  
30 glucose (FPG), total cholesterol (TC), triglycerides (TG), low density  
31  
32 lipoprotein-cholesterol (LDL-C), high-density lipoprotein-cholesterol (HDL-C),  
33  
34 serum creatinine (Scr), blood urea nitrogen (BUN), and serum uric acid (UA). This  
35  
36 study was approved by the Ethics Committee of the Affiliated Hospital at Shunde of  
37  
38 the Southern Medical University.  
39  
40  
41  
42  
43  
44  
45  
46  
47

### 48 **Definition of Correlative Risk Factors**

49  
50  
51 Correlative risk factors estimated in our study included the following: (1) BP  
52  
53 classification was based on the recommendations from the JNC 7.<sup>1</sup> Normal BP was  
54  
55 defined as SBP < 120 mm Hg and DBP < 80 mm Hg. Hypertension was defined as  
56  
57  
58  
59  
60

1  
2  
3  
4 SBP  $\geq$  140 mm Hg and/or DBP  $\geq$  90 mm Hg, or previously diagnosed as hypertension  
5  
6 and currently undergoing antihypertensive treatment. Prehypertension was defined if  
7  
8 patients were not undergoing antihypertensive treatment and had a SBP of 120–139  
9  
10 mm Hg and/or DBP of 80–89 mm Hg. Prehypertension was further divided into  
11  
12 low-range (SBP 120–129 and/or DBP 80–84 mmHg) and high-range (SBP 130–139  
13  
14 mmHg and/or DBP 85–89 mmHg) subgroups. (2) Impaired glucose regulation was  
15  
16 diagnosed based on FPG according to the American Diabetes Association criteria,<sup>10</sup>  
17  
18 including diabetes (FPG  $\geq$  7.0 mmol/L) and impaired fasting glucose (IFG, FPG  
19  
20 5.6–6.9 mmol/L). Dyslipidemia was defined as a history of receiving antidyslipidemia  
21  
22 agents or as satisfying criteria on admission such as TC  $\geq$  5.18 mmol/L, LDL-C  $\geq$   
23  
24 3.37 mmol/L, HDL-C  $<$  1.04 mmol/L, and/or TG  $\geq$  1.7 mmol/L according to the 2007  
25  
26 Guidelines for Prevention and Treatment of Dyslipidemia in Adults in China.<sup>11</sup>  
27  
28 Hyperuricemia was defined as UA  $\geq$  416  $\mu$ mol/L in men and 357 mol/L in women. (3)  
29  
30 Overweight and obesity were defined as body mass index (BMI) 24–27.9 kg/m<sup>2</sup> and  
31  
32 BMI  $\geq$  28 kg/m<sup>2</sup> according to Chinese criteria.<sup>12</sup> (4) The estimated glomerular  
33  
34 filtration rate (eGFR) of each participant was estimated using the modified  
35  
36 Modification of Diet in Renal Disease equation adapted for Chinese,<sup>13</sup> as: eGFR =  
37  
38  $186 \times \text{Scr}^{-1.154} \times \text{Age}^{-0.203} \times 0.742$  (Female)  $\times 1.233$  (Chinese).  
39  
40  
41  
42  
43  
44  
45  
46  
47  
48

### 49 **Statistical Analysis**

50  
51 Statistical analysis was performed using the Statistical Package for the Social  
52  
53 Science software release 16.0 (SPSS Inc., Chicago, IL, USA). Continuous variables  
54  
55 are presented as mean  $\pm$  standard deviation or median (inter-quartile range) as  
56  
57  
58  
59  
60



1  
2  
3 appropriate. Categorical variables are expressed as percentages. After testing for  
4  
5 normality using the Kolmogorov–Smirnov test, continuous variables were compared  
6  
7 using a *t*-test or the Mann–Whitney *U*-test, categorical variables were compared by  
8  
9 chi-square test or Fisher’s exact test as appropriate. Multiple logistic regression  
10  
11 analysis was performed to evaluate predictive factors for prehypertension. A value of  
12  
13  $P < 0.05$  was considered statistically significant.

### 14 15 16 17 18 19 **Ethical clearance**

20  
21 The study was reviewed and approved by the Health Authority Research Ethics Board  
22  
23 of the Affiliated Hospital at Shunde (the First People's Hospital of Shunde), Southern  
24  
25 Medical University, PR China.  
26  
27  
28  
29  
30

## 31 32 **Results**

### 33 34 **Prevalence of Prehypertension**

35  
36 Of the 5,362 cases (aged  $\geq 35$  years) initially reviewed, 651 cases were excluded  
37  
38 because of missing data. Finally, 4711 cases (2674 men, 2037 women) were analyzed.  
39  
40 The proportions of optimal BP, prehypertension, and hypertension were 39.1% (1842  
41  
42 cases), 38.6% (1819 cases), and 22.3% (1050 cases), respectively. The incidence of  
43  
44 prehypertension was higher in men than in women (43.5% vs. 32.2%,  $P < 0.001$ ).  
45  
46  
47 There was an increasing trend of prehypertension prevalence associated with age in  
48  
49 men, but in women, the prevalence of prehypertension increased up to the age of  
50  
51 50–64 years and then decreased (Table 1).  
52  
53  
54  
55  
56  
57  
58  
59  
60

### **Risk Factors Clustering in Different Blood Pressure Statuses**

The average age, proportion of male sex, family history of hypertension, overweight, IFG, dyslipidemia, hyperuricemia, levels of FPG, TC, TG, BMI, and UA were significantly higher in prehypertension and hypertension groups than in the optimal BP group (all  $P < 0.05$ ). The proportions of DM, obesity, and levels of LDL-C were also higher in the hypertension groups than in the optimal BP group (all  $P < 0.05$ ); however, the differences were not significant in the prehypertension group (Table 2)

### **Cardiovascular Risk Factors in Different Sub-ranges of Prehypertension**

To explore the heterogeneity within the prehypertension category, patients with prehypertension were further classified into low- and high-range subgroups. The proportions of male sex, overweight, IFG, BMI, and levels of FPG were higher in the low-range prehypertension group than in the optimal BP group (all  $P < 0.05$ ), but there were no significant differences for other cardiovascular risk factors (all  $P > 0.05$ ). The proportions of male sex, overweight, obesity, dyslipidemia, diabetes, IFG, hyperuricemia, BMI, and levels of TC, LDL-C, TG, FPG, and UA were higher in the high-range prehypertension group than in the optimal BP group (all  $P < 0.05$ ). Compared with low-range prehypertension, the proportions of overweight, dyslipidemia, and IFG were higher in the high-range prehypertension (all  $P < 0.05$ ) (Table 3).

### Risk Factors Associated with Prehypertension

The multivariable-adjusted risk factors associated with prehypertension are presented in Table 4. High BMI (overweight/obesity) was the most important risk factor of prehypertension [odds ratio (*OR*)=2.89, 95% confidence interval (*CI*)=1.56–5.35, *P* < 0.001]. Age ( $\geq 50$  years, *OR*=1.78, 95% *CI*=1.11–2.85, *P*=0.02), male sex (*OR*=2.15, 95% *CI*=1.37–3.37, *P* < 0.001), and hyperuricemia (*OR*=1.69, 95% *CI*=1.18–2.64, *P*=0.02) were also significantly associated with prehypertension.

### Discussion

In this study, we found that prehypertension is highly prevalent in the Shunde District, Guangdong Province. Prehypertensive individuals presented with other risk factors associated with cardiovascular disease, such as overweight, dyslipidemia, impaired glucose, and hyperuricemia. Furthermore, combined risk factors were more significant in people with high-range prehypertension. To our knowledge, this is the first study to show that there was a significant heterogeneity of combined risk factors within the prehypertensive subgroups.

Many epidemiological studies have demonstrated that prehypertension is an important public health problem. However, the prevalence of prehypertension in different countries and districts differs significantly, and may be influenced by different regional factors, such as climate and lifestyle, as well as ethnicity. At the beginning of this century (2000–2001), a cross-sectional survey found that the incidence of prehypertension was 21.9% among Chinese subjects aged between 35

1  
2  
3 and 74 years.<sup>3</sup> However, in other subsequent studies, the incidence of prehypertension  
4  
5 was significantly higher than this ratio. In northeast China, the incidence of  
6  
7 prehypertension was up to 40%,<sup>2, 4, 14</sup> which may be associated with the cold climate  
8  
9 and high-sodium diet. In this study, we found that the prevalence of prehypertension  
10  
11 in the Shunde District of Guangdong Province, a traditional but economically  
12  
13 developed district of southern China, was up to 38.6%. The incidence was very  
14  
15 similar to the prevalence of the northern area, and it was significantly higher than the  
16  
17 incidence reported at the beginning of this century for the entire country.<sup>3</sup> Further  
18  
19 analysis showed that increased BMI was the most important risk factor of  
20  
21 prehypertension in our study. Even among patients with low-range prehypertension,  
22  
23 BMI was significantly increased compared with the optimal BP group. Therefore, our  
24  
25 study suggests that although sodium intake is relatively low in Guangdong Province  
26  
27 in southern China,<sup>15</sup> the prevalence of prehypertension is almost as high as that in the  
28  
29 northern area. With the economic development and lifestyle changes,  
30  
31 obesity/overweight has become a very important risk factor for increased BP.  
32  
33  
34  
35  
36  
37  
38  
39  
40

41 Although the proportions of IFG and dyslipidemia were higher in prehypertension  
42  
43 than optimal BP groups, in multivariable analysis, the associations of IFG and  
44  
45 dyslipidemia with prehypertension were not significant after adjustment for BMI.  
46  
47  
48 Many studies have documented that overweight/obesity can cause significant insulin  
49  
50 resistance, which may play an important role in impaired glucose metabolism,  
51  
52 dyslipidemia, and increased BP.<sup>16, 17</sup> Clinical studies have shown that weight control  
53  
54 can significantly lower BP.<sup>18</sup> These results indicated that lifestyle modifications, such  
55  
56  
57  
58  
59  
60

1  
2  
3  
4 as weight loss, are effective in the long-term primary prevention of hypertension.  
5  
6 With the economic development and lifestyle changes, lifestyle modifications should  
7  
8 be emphasized as a cornerstone in modern China.  
9

10  
11 Added to traditional risk factors, previous studies have found that serum UA  
12  
13 levels were significantly associated with prehypertension.<sup>19,20</sup> The mechanisms may  
14  
15 be associated with inhibition of the nitric oxide pathway and activation of the  
16  
17 renin-angiotensin system. Further, UA can cause proliferation of vascular smooth  
18  
19 muscle cells and renal microvascular damage because of local inflammation and  
20  
21 oxidative stress, finally leading to high BP.<sup>21,22</sup> In our study, we found that the level  
22  
23 of UA tended to increase in the low-range prehypertension group ( $P = 0.07$ ), and the  
24  
25 difference was significant between high-range prehypertension and the optimal BP  
26  
27 groups. These results indicate that the effect of UA on BP may be increased  
28  
29 throughout the entire prehypertension range.  
30  
31  
32  
33  
34  
35

36  
37 In a recent randomized controlled trial, prehypertensive obese adolescents aged  
38  
39 11–17 years were enrolled and randomized to urate-lowering therapy (including  
40  
41 allopurinol or probenecid) or placebo. Subjects treated with urate-lowering therapy  
42  
43 experienced a highly significant reduction in BP (SBP 10.2 mm Hg and DBP 9.0 mm  
44  
45 Hg, respectively). Systemic vascular resistance was also reduced in the urate-lowering  
46  
47 therapy group.<sup>23</sup> Their findings strongly supported the synergistic pathogenic role of  
48  
49 uric acid and obesity in hypertension. Genes and diet are important factors affecting  
50  
51 the levels of UA; therefore, we emphasize the importance of lifestyle modification  
52  
53 interventions for people with prehypertension.  
54  
55  
56  
57  
58  
59  
60

1  
2  
3  
4 It was interesting that there was significant ‘heterogeneity’ of combined  
5  
6 cardiovascular risk factors within the prehypertensive subgroups in our study.  
7  
8 Compared with optimal BP, BMI and FPG were increased in the low-range  
9  
10 prehypertension group and were increased even further in the high-range  
11  
12 prehypertension group. Furthermore, the proportions of overweight, dyslipidemia, and  
13  
14 IFG were higher in the high-range prehypertension than those in the low-range  
15  
16 prehypertension groups. These findings confirmed the importance of the definition of  
17  
18 prehypertension, as well as the inhomogeneity of the prehypertension subcategories.  
19  
20 Thus, we consider that healthcare professionals should recommend lifestyle changes  
21  
22 to subjects with prehypertension. Furthermore, high-risk subpopulations with  
23  
24 prehypertension, especially those with high-range prehypertension should be selected  
25  
26 for future controlled trials to evaluate the effects of pharmacological treatment on this  
27  
28 population.  
29  
30  
31  
32  
33  
34  
35

36 Several limitations of this study must be considered. First, our data were based  
37  
38 on community-based health checkup information, and not from a multi-stage stratified  
39  
40 clustering sample. This may cause bias of the incidence of prehypertension. Second,  
41  
42 some important confounding factors possibly associated with increased BP, such as  
43  
44 diet, physical activity, and socioeconomic factors, were not evaluated in the present  
45  
46 study. Third, follow up data of individuals with prehypertension were lack and further  
47  
48 studies were needed on the matter.  
49  
50  
51  
52  
53  
54  
55  
56  
57  
58  
59  
60

1  
2  
3 **Contributors** YulH, YunH, and DX conceptualised the study, designed the protocol.  
4  
5 YulH, WQ and XC analysed the data and drafted the manuscript. CL, DZ, JH  
6  
7 collected the data. YW, YunH, and DX revised the manuscript. YunH and DX  
8  
9 participated in administrative and technical support.  
10

11  
12 **Funding** This research received no specific grant from any funding agency in the  
13  
14 public, commercial or not-for-profit sectors.  
15

16  
17 **Competing interests** None.  
18

19  
20 **Data Sharing Statement:** No additional data available  
21  
22  
23  
24  
25  
26  
27  
28  
29  
30  
31  
32  
33  
34  
35  
36  
37  
38  
39  
40  
41  
42  
43  
44  
45  
46  
47  
48  
49  
50  
51  
52  
53  
54  
55  
56  
57  
58  
59  
60

**References:**

1. Chobanian AV, Bakris GL, Black HR, *et al.* The Seventh Report of the Joint National Committee on Prevention, Detection, Evaluation, and Treatment of High Blood Pressure: the JNC 7 report. *JAMA* 2003; 289: 2560-72.
2. Sun Z, Zheng L, Xu C, *et al.* Prevalence of prehypertension, hypertension and, associated risk factors in Mongolian and Han Chinese populations in Northeast China. *Int J Cardiol* 2008; 128: 250-4.
3. Yu D, Huang J, Hu D, *et al.* Prevalence and risk factors of prehypertension among Chinese adults. *J Cardiovasc Pharmacol* 2008; 52: 363-8.
4. Sun Z, Zheng L, Wei Y, *et al.* Prevalence and risk factors of the rural adult people prehypertension status in Liaoning Province of China. *Circ J* 2007; 71: 550-3.
5. Liu LS [2010 Chinese guidelines for the management of hypertension]. *Zhonghua Xin Xue Guan Bing Za Zhi* 2011; 39: 579-615.
6. Elliott WJ, Black HR Prehypertension. *Nat Clin Pract Cardiovasc Med* 2007; 4: 538-48.
7. Egan BM, Lackland DT, Jones DW. Prehypertension: an opportunity for a new public health paradigm. *Cardiol Clin* 2010; 28: 561-9.
8. Pimenta E, Oparil S Prehypertension: epidemiology, consequences and treatment. *Nat Rev Nephrol* 2010; 6: 21-30.
9. Gupta P, Nagaraju SP, Gupta A, Mandya CK. Prehypertension - time to act. *Saudi J Kidney Dis Transpl* 2012; 23: 223-33.
10. Report of the Expert Committee on the Diagnosis and Classification of Diabetes



1  
2  
3  
4 Mellitus. *Diabetes Care* 2000; 23: S4-19.

5  
6 **11.** [Chinese guidelines on prevention and treatment of dyslipidemia in adults].

7  
8  
9 *Zhonghua Xin Xue Guan Bing Za Zhi* 2007; 35: 390-419.

10  
11 **12.** Zhou B. [Predictive values of body mass index and waist circumference to risk  
12 factors of related diseases in Chinese adult population]. *Zhonghua Liu Xing Bing Xue*  
13  
14  
15  
16  
17 *Za Zhi* 2002; 23: 5-10.

18  
19 **13.** Ma YC, Zuo L, Chen JH, *et al*: Modified glomerular filtration rate estimating  
20 equation for Chinese patients with chronic kidney disease. *J Am Soc Nephrol* 2006; 17:  
21  
22  
23  
24  
25 2937-44.

26  
27 **14.** Dong GH, Wang D, Liu MM, *et al*. Sex difference of the prevalence and risk  
28 factors associated with prehypertension among urban Chinese adults from 33  
29 communities of China: the CHPSNE study. *J Hypertens* 2012; 30: 485-91.

30  
31  
32  
33  
34 **15.** Cheng TO. Systolic and diastolic blood pressures and urinary sodium excretion in  
35 mainland China. *QJM* 2000; 93: 557-8.

36  
37  
38  
39 **16.** Tobias DK, Pan A, Jackson CL, *et al*. Body-mass index and mortality among  
40 adults with incident type 2 diabetes. *N Engl J Med* 2014; 370: 233-44.

41  
42  
43  
44 **17.** Gillman MW, Ludwig DS. How early should obesity prevention start? *N Engl J*  
45  
46  
47 *Med* 2013; 369: 2173-5.

48  
49 **18.** Tyson CC, Appel LJ, Vollmer WM, *et al*. Impact of 5-year weight change on  
50 blood pressure: results from the Weight Loss Maintenance trial. *J Clin Hypertens*.  
51  
52  
53  
54 2013;15:458-64.

55  
56  
57 **19.** Liang J, Xue Y, Zou C, Zhang T, Song H, Qi L. Serum uric acid and  
58  
59  
60

1  
2  
3  
4 prehypertension among Chinese adults. *J Hypertens* 2009; 27: 1761-5.

5  
6 **20.** Kawamoto R, Tabara Y, Kohara K, Kusunoki T, Abe M, Miki T. Interaction  
7  
8 between serum uric acid and triglycerides in relation to prehypertension in  
9  
10 community-dwelling Japanese adults. *Clin Exp Hypertens* 2014; 36: 64-9.

11  
12  
13 **21.** Soltani Z, Rasheed K, Kapusta DR, Reisin E. Potential role of uric acid in  
14  
15 metabolic syndrome, hypertension, kidney injury, and cardiovascular diseases: is it  
16  
17 time for reappraisal? *Curr Hypertens Rep* 2013; 15: 175-81.

18  
19  
20  
21 **22.** Reynolds TM. Serum uric acid and new-onset hypertension: a possible therapeutic  
22  
23 avenue? *J Hum Hypertens* 2014;28:519-20.

24  
25  
26 **23.** Soletsky B, Feig DI. Uric acid reduction rectifies prehypertension in obese  
27  
28 adolescents. *Hypertension* 2012; 60: 1148-56.  
29  
30  
31  
32  
33  
34  
35  
36  
37  
38  
39  
40  
41  
42  
43  
44  
45  
46  
47  
48  
49  
50  
51  
52  
53  
54  
55  
56  
57  
58  
59  
60

Table 1 Prevalence of Prehypertension and Hypertension by Sex and Age Group

| Age (years)   | n    | Optimal BP (%) | Prehypertension (%) | Hypertension (%) |
|---------------|------|----------------|---------------------|------------------|
| <b>Male</b>   |      |                |                     |                  |
| 35~49         | 970  | 48.1           | 34.4                | 17.4             |
| 50~64         | 996  | 27.1           | 48.0                | 24.9             |
| ≥ 65          | 708  | 20.6           | 49.6                | 29.8             |
| Total         | 2037 | 33.0           | 43.5                | 23.5             |
| <b>Female</b> |      |                |                     |                  |
| 35~49         | 758  | 59.8           | 26.5                | 12.9             |
| 50~64         | 797  | 42.3           | 36.3                | 22.2             |
| ≥ 65          | 482  | 35.1           | 34.4                | 30.5             |
| Total         | 2674 | 47.1           | 32.2                | 20.7             |
| <b>All</b>    |      |                |                     |                  |
| 35~49         | 1728 | 53.2           | 31.0                | 15.5             |
| 50~64         | 1793 | 33.9           | 42.8                | 23.7             |
| ≥ 65          | 1190 | 26.5           | 43.4                | 30.1             |
| Total         | 4711 | 39.1           | 38.6                | 22.3             |

BP: blood pressure

**Table 2 Cardiovascular Risk Factors in Different Blood Pressure Statuses**

|                                        | Optimal BP<br>(n=1842) | Prehypertension<br>(n=1819) | Hypertension<br>(n=1050) | <i>P</i> |
|----------------------------------------|------------------------|-----------------------------|--------------------------|----------|
| Age (years)                            | 48.8±10.5              | 52.1±11.3 <sup>△</sup>      | 54.3±10.4 <sup>△</sup>   | 0.008    |
| Male [n (%)]                           | 829 (45.0)             | 1163 (63.9) <sup>△</sup>    | 628 (59.8) <sup>△§</sup> | <0.001   |
| Smoking [n (%)]                        | 301 (16.3)             | 287 (15.8)                  | 186 (17.7)               | 0.77     |
| Alcoholic [n (%)]                      | 35 (1.9)               | 42 (2.3)                    | 27 (2.6)                 | 0.464    |
| Family history of Hypertension [n (%)] | 274 (14.9)             | 292 (16.1) <sup>△</sup>     | 203 (19.3) <sup>△§</sup> | 0.007    |
| Overweight [n (%)]                     | 236 (12.8)             | 395(21.7) <sup>△</sup>      | 241(23.0) <sup>△</sup>   | <0.001   |
| Obesity [n (%)]                        | 128(6.9)               | 156(8.6)                    | 98(9.3) <sup>△</sup>     | 0.019    |
| BMI (kg/m <sup>2</sup> )               | 21.6±3.2               | 24.9±3.5 <sup>△</sup>       | 25.6±4.8 <sup>△</sup>    | 0.001    |
| Dyslipidemia [n (%)]                   | 420(22.8)              | 488(26.8) <sup>△</sup>      | 312(29.7) <sup>△§</sup>  | <0.001   |
| TC (mmol/L)                            | 5.02±1.25              | 5.39±1.67 <sup>△</sup>      | 5.64±1.59 <sup>△§</sup>  | 0.01     |
| LDL-C (mmol/L)                         | 3.21±1.15              | 3.45±1.18                   | 3.68±1.32 <sup>△</sup>   | 0.03     |
| HDL-C (mmol/L)                         | 1.18±0.36              | 1.09±0.38                   | 1.02±0.41                | 0.75     |
| TG(mmol/L)                             | 1.66±0.42              | 2.07±0.58 <sup>△</sup>      | 2.09±0.63 <sup>△</sup>   | 0.001    |
| DM [n (%)]                             | 138(7.5)               | 168(9.2)                    | 109(10.4) <sup>△</sup>   | 0.002    |
| IFG [n (%)]                            | 261(14.2%)             | 384(21.1%) <sup>△</sup>     | 275(26.2) <sup>△§</sup>  | <0.001   |
| FPG (mmol/L)                           | 5.14±1.96              | 5.79±2.03 <sup>△</sup>      | 5.91±2.27 <sup>△</sup>   | 0.003    |
| Scr (mmol/L)                           | 72.2±19.7              | 75.0±25.1                   | 79.2±28.9                | 0.14     |
| BUN (mmol/L)                           | 5.34±1.71              | 6.01±1.87                   | 6.25±1.99                | 0.35     |
| eGFR (ml/min/1.73 m <sup>2</sup> )     | 126.8±27.9             | 125.2±29.4                  | 118.1±28.6               | 0.76     |
| Hyperuricemia [n (%)]                  | 233(12.6%)             | 302(16.6%) <sup>△</sup>     | 226(21.5) <sup>△§</sup>  | 0.001    |
| UA (mmol/L)                            | 377.5±32.2             | 402.9±34.6 <sup>△</sup>     | 428.1±33.8 <sup>△§</sup> | 0.007    |

BP, blood pressure; BMI, body mass index; TC, total cholesterol; LDL-C, low-density lipoprotein cholesterol; HDL-C, high-density lipoprotein cholesterol; TG, triglycerides; IFG, impaired fasting glucose; Scr, serum creatinine; BUN, blood urea nitrogen; eGFR, estimated glomerular filtration rate; UA, serum uric acid

△ vs. Optimal blood pressure *P* < 0.05, § vs. prehypertension *P* < 0.05

**Table 3 Cardiovascular Risk Factors Different Sub-ranges of Prehypertension**

|                                        | Low range prehypertension<br>(n=925) | High<br>prehypertension (n=894) | range <i>P</i> |
|----------------------------------------|--------------------------------------|---------------------------------|----------------|
| Age (years)                            | 50.6±11.2                            | 53.7±12.4 <sup>#</sup>          | 0.08           |
| Male [n (%)]                           | 584 (63.1%) <sup>#</sup>             | 579 (64.8%) <sup>#</sup>        | 0.47           |
| Smoking [n (%)]                        | 149 (16.1%)                          | 138 (15.4%)                     | 0.69           |
| Alcoholic [n (%)]                      | 20 (1.9%)                            | 22 (2.7%)                       | 0.29           |
| Family history of Hypertension [n (%)] | 153 (16.5%)                          | 139 (15.5%)                     | 0.56           |
| Overweight [n (%)]                     | 183 (19.8%) <sup>#</sup>             | 212 (23.7%) <sup>#</sup>        | 0.04           |
| Obesity [n (%)]                        | 75 (8.1%)                            | 81(9.1%) <sup>*</sup>           | 0.47           |
| BMI (kg/m <sup>2</sup> )               | 23.7±3.3 <sup>*</sup>                | 26.1±3.9 <sup>#</sup>           | <0.001         |
| Dyslipidemia [n (%)]                   | 227 (24.5%)                          | 261 (29.2%) <sup>#</sup>        | 0.025          |
| TC (mmol/L)                            | 5.25±1.38                            | 5.53±1.70 <sup>#</sup>          | 0.04           |
| LDL-C (mmol/L)                         | 3.33±1.08                            | 3.58±1.19 <sup>*</sup>          | 0.10           |
| HDL-C (mmol/L)                         | 1.14±0.35                            | 1.03±0.37                       | 0.69           |
| TG(mmol/L)                             | 1.81±0.56                            | 2.34±0.67 <sup>*</sup>          | 0.12           |
| DM [n (%)]                             | 78 (8.4%)                            | 90 (10.1%) <sup>*</sup>         | 0.23           |
| IFG [n (%)]                            | 171 (18.5%) <sup>#</sup>             | 213 (23.8%) <sup>#</sup>        | 0.005          |
| FPG (mmol/L)                           | 5.52±1.91 <sup>*</sup>               | 6.07±2.05 <sup>#</sup>          | 0.002          |
| Scr (mmol/L)                           | 76.1±29.4                            | 73.8±27.0                       | 0.18           |
| BUN (mmol/L)                           | 5.98±2.02                            | 6.04±1.79                       | 0.37           |
| eGFR (ml/min/1.73 m <sup>2</sup> )     | 128.7±30.6                           | 121.6±28.4                      | 0.29           |
| Hyperuricemia [n (%)]                  | 140 (15.1%)                          | 162 (18.1%) <sup>#</sup>        | 0.09           |
| UA (mmol/L)                            | 392.5±40.2                           | 411.8±37.9 <sup>#</sup>         | 0.08           |

BMI, body mass index; TC, total cholesterol; LDL-C, low-density lipoprotein cholesterol; HDL-C, high-density lipoprotein cholesterol; TG, triglycerides; IFG, impaired fasting glucose; Scr, serum creatinine; BUN, blood urea nitrogen; eGFR, estimated glomerular filtration rate; UA, serum uric acid

\* vs optimal blood pressure  $P < 0.05$ , # vs Optimal blood pressure  $P < 0.01$

**Table 4 Multivariate Logistic Regression Analysis for Risk Factors of Prehypertension**

| <b>Risk Factors</b>                        | <i>OR</i> | <i>95%CI</i> | <i>P</i> 值 |
|--------------------------------------------|-----------|--------------|------------|
| Age ( $\geq 50$ years vs $< 50$ years)     | 1.78      | 1.11~2.85    | 0.02       |
| Sex (Men vs Women)                         | 2.15      | 1.37~3.37    | $< 0.001$  |
| Smoking (Yes vs No)                        | 0.97      | 0.73~1.29    | 0.83       |
| Alcoholic (Yes vs No)                      | 1.09      | 0.82~1.45    | 0.55       |
| Family history of Hypertension (Yes vs No) | 1.24      | 0.90~1.71    | 0.19       |
| overweight/obesity (Yes vs No)             | 2.89      | 1.56~5.35    | $< 0.001$  |
| Dyslipidemia (Yes vs No)                   | 1.58      | 0.92~2.71    | 0.09       |
| Impaired glucose regulation (Yes vs No)    | 1.63      | 0.96~2.78    | 0.07       |
| Hyperuricemia (Yes vs No)                  | 1.69      | 1.18~2.64    | 0.02       |

# BMJ Open

## Prevalence and Risk Factors Associated with Prehypertension in Shunde District, Southern China

|                                 |                                                                                                                                                                                                                                                                                                                                                                                                                                                                                                                                                                                                                                                                                                |
|---------------------------------|------------------------------------------------------------------------------------------------------------------------------------------------------------------------------------------------------------------------------------------------------------------------------------------------------------------------------------------------------------------------------------------------------------------------------------------------------------------------------------------------------------------------------------------------------------------------------------------------------------------------------------------------------------------------------------------------|
| Journal:                        | <i>BMJ Open</i>                                                                                                                                                                                                                                                                                                                                                                                                                                                                                                                                                                                                                                                                                |
| Manuscript ID:                  | bmjopen-2014-006551.R1                                                                                                                                                                                                                                                                                                                                                                                                                                                                                                                                                                                                                                                                         |
| Article Type:                   | Research                                                                                                                                                                                                                                                                                                                                                                                                                                                                                                                                                                                                                                                                                       |
| Date Submitted by the Author:   | 08-Oct-2014                                                                                                                                                                                                                                                                                                                                                                                                                                                                                                                                                                                                                                                                                    |
| Complete List of Authors:       | Xu, Dingli; Nanfang Hospital, Southern Medical University, Cardiology<br>Huang, Yuli; Nanfang Hospital, Southern Medical University, Cardiology<br>Qiu, Wenke; the First People's Hospital of Shunde, Health Management Center<br>Liu, Changhua; Nanfang Hospital, Southern Medical University, Cardiology<br>Zhu, Dingji; Nanfang Hospital, Southern Medical University, Cardiology<br>Hua, Jinghai; Nanfang Hospital, Southern Medical University, Cardiology<br>Cai, Xiaoyan; the First People's Hospital of Shunde, Foshan, Cardiology<br>Wu, Yanxian; the First People's Hospital of Shunde, Foshan, Cardiology<br>Hu, Yunzhao; the First People's Hospital of Shunde, Foshan, Cardiology |
| <b>Primary Subject Heading</b>: | Epidemiology                                                                                                                                                                                                                                                                                                                                                                                                                                                                                                                                                                                                                                                                                   |
| Secondary Subject Heading:      | Cardiovascular medicine, Global health, Public health                                                                                                                                                                                                                                                                                                                                                                                                                                                                                                                                                                                                                                          |
| Keywords:                       | Cardiac Epidemiology < CARDIOLOGY, Hypertension < CARDIOLOGY, EPIDEMIOLOGY                                                                                                                                                                                                                                                                                                                                                                                                                                                                                                                                                                                                                     |
|                                 |                                                                                                                                                                                                                                                                                                                                                                                                                                                                                                                                                                                                                                                                                                |

SCHOLARONE™  
Manuscripts

only

1  
2  
3  
4 **Prevalence and Risk Factors Associated with Prehypertension in**  
5  
6  
7 **Shunde District, Southern China**  
8  
9

10  
11 Running head: Prevalence and Risk Factors of Prehypertension  
12  
13

14  
15  
16 Yuli Huang,<sup>1,2\*</sup> Wenke Qiu,<sup>3\*</sup> Changhua Liu,<sup>1</sup> Dingji Zhu,<sup>1</sup> Jinghai Hua,<sup>1</sup> Xiaoyan  
17  
18 Cai,<sup>2</sup> Yanxian Wu,<sup>2</sup> Yunzhao Hu,<sup>2</sup> Dingli Xu<sup>1</sup>  
19

20  
21 <sup>1</sup> Department of Cardiology, Nanfang Hospital, Southern Medical University,  
22  
23 Guangzhou, PR China; <sup>2</sup> Department of Cardiology, the First People's Hospital of  
24  
25 Shunde, Foshan, PR China; <sup>3</sup> Department of Health Management Center, the First  
26  
27 People's Hospital of Shunde, PR China  
28  
29  
30  
31

32  
33  
34 \* The authors contributed equally to this work  
35

36 Corresponding author: Professor Dingli Xu. Department of Cardiology, Nanfang  
37  
38 Hospital, Southern Medical University, Guangzhou, PR China. Tel.: + 86 20  
39  
40 61641503 Fax: + 86 20 87705671 E-mail: [dinglixu@fimmu.com](mailto:dinglixu@fimmu.com) Or Professor  
41  
42 Yunzhao Hu, Department of Cardiology, the First People's Hospital of Shunde,  
43  
44 Foshan, PR China. Tel.: + 86 757 22318680 Fax: + 86 757 22223899 E-mail:  
45  
46  
47 [huyunzhao4406@163.com](mailto:huyunzhao4406@163.com)  
48  
49  
50  
51  
52  
53  
54  
55  
56  
57  
58  
59  
60



**ABSTRACT**

**OBJECTIVE:** To explore the prevalence and combined cardiovascular risk factors of prehypertension in southern China.

**DESIGN:** A retrospective study; the logistic regression model was used to find the risk factors of prehypertension.

**SETTING:** The study was conducted in Shunde District, Southern China, using the community-based health checkup information.

**PARTICIPANTS:** Subjects aged  $\geq 35$  years with complete health checkup information data between January 2011 and December 2013 were enrolled and divided into hypertension, prehypertension, and optimal blood pressure (BP). Prehypertension was further divided into low-range (BP 120-129/80-84 mmHg) and high-range (BP 130-139/85-89 mmHg) subgroups.

**OUTCOME MEASURES:** The prevalence of prehypertension and the combined cardiovascular risk factors within the prehypertensive subgroups.

**RESULTS:** Of the 5,362 initially reviewed cases (aged  $\geq 35$  years), 651 cases were excluded because of missing data. The proportions of optimal BP, prehypertension, and hypertension were 39.1%, 38.6%, and 22.3%, respectively. The average age, proportion of male sex, overweight, impaired fasting glucose (IFG), dyslipidemia, and hyperuricemia were significantly higher in the prehypertension group than in the optimal BP group (all  $P < 0.05$ ). Compared with low-range prehypertension, the proportions of overweight, dyslipidemia, and IFG were higher in the high-range prehypertension group (all  $P < 0.05$ ). Multivariate logistic regression analysis showed that overweight [odds ratio (OR) = 2.84, 95% confidence interval (CI) = 1.55–5.20], male sex (OR = 2.19, 95% CI = 1.39–3.45), age (per 10 years, OR=1.21, 95% CI=1.02–1.44,  $P=0.03$ ) and hyperuricemia (OR = 1.70, 95% CI = 1.14–2.54) were

1  
2  
3 independent risk factors of prehypertension.  
4

5 **CONCLUSIONS:** Prehypertension is highly prevalent in southern China.  
6

7 Prehypertensive individuals presented with many other cardiovascular risk factors.  
8

9 There was heterogeneity of combined risk factors within the prehypertensive  
10 subgroups.  
11  
12

13  
14 **Keywords:** Prehypertension; Prevalence; Risk Factors  
15  
16  
17  
18  
19  
20  
21  
22  
23  
24  
25  
26  
27  
28  
29  
30  
31  
32  
33  
34  
35  
36  
37  
38  
39  
40  
41  
42  
43  
44  
45  
46  
47  
48  
49  
50  
51  
52  
53  
54  
55  
56  
57  
58  
59  
60

### Strengths and limitations of this study

- This study first documented prehypertension is highly prevalent in the Shunde District, southern China.
- With the economic development and lifestyle changes in China, obesity/overweight has become a very important risk factor for increased blood pressure.
- This is the first study to show that there was a significant heterogeneity of combined risk factors within the prehypertensive subgroups.
- Some important confounding factors possibly associated with increased blood pressure were not evaluated in the present study.

## Introduction

In 2003, the seventh report of the Joint National Committee on Prevention, Detection, Evaluation, and Treatment of High Blood Pressure (JNC 7) proposed a new blood pressure (BP) category, including 120–139 mmHg systolic blood pressure (SBP) or 80–89 mmHg diastolic blood pressure (DBP), designated as “prehypertension”.<sup>1</sup> The prevalence of prehypertension is up to 30–50% worldwide, as well as in many districts of China.<sup>2,4</sup> It is known that in China, the prevalence of hypertension is significantly higher in the northern than that in the southern area because of the colder climate and high-sodium intake.<sup>5</sup> Such regional factors may also affect the prevalence of prehypertension. However, the prevalence of prehypertension in Guangdong Province, southern China has been rarely reported.

Prehypertensive individuals are prone to progress into frank hypertension, and most of them present with clustering of other cardiovascular risk factors.<sup>6–8</sup> However, the term of “prehypertension” has been contentious. Most arguments against using this term consist of the possible public anxiety and overtreatment it may cause. Further, there is a high heterogeneity within this category because the risk of progressing to hypertension and developing cardiovascular disease is higher among people with BP 130–139/85–89 mmHg than among those with BP 120–129/80–84 mmHg.<sup>6, 9</sup> Furthermore, whether the concurrent cardiovascular risk factors in subgroups of prehypertension are different remains unanswered.

Given these inconsistent results, we conducted a retrospective analysis to explore the prevalence of prehypertension, and the cardiovascular risk factors in the

1  
2  
3  
4 sub-groups of prehypertension in Guangdong Province, southern China.  
5  
6  
7

## 8 9 **Methods**

### 10 11 **Study Participants**

12  
13  
14 We performed a retrospective study in Shunde District, a traditional but  
15 economically developed district of Guangdong Province, in China, using the  
16 community-based health checkup information. Community-based health checkup  
17 information was collected in the Health Management Center of the First People's  
18 Hospital of Shunde. The centers provided data for participants who enrolled in their  
19 health checkup programs conducted between January 2011 and December 2013.  
20  
21 Subjects aged  $\geq 35$  years with complete data for the following characteristics were  
22 included in this study: age, sex, smoking/drinking habits, history of chronic diseases  
23 and treatment, family history of hypertension, height, weight, BP, fasting plasma  
24 glucose (FPG), total cholesterol (TC), triglycerides (TG), low density  
25 lipoprotein-cholesterol (LDL-C), high-density lipoprotein-cholesterol (HDL-C),  
26 serum creatinine (Scr), blood urea nitrogen (BUN), and serum uric acid (UA).  
27  
28  
29  
30  
31  
32  
33  
34  
35  
36  
37  
38  
39  
40  
41  
42  
43  
44  
45

### 46 47 **Blood pressure measurement**

48  
49 Although our data were based on retrospective analysis of community-based  
50 health checkup information, the protocol of blood pressure measurement in our Health  
51 Management Center are carried out consistently since the foundation of the  
52 department. Subjects were asked to avoid caffeinated beverages, smoking and  
53  
54  
55  
56  
57  
58  
59  
60

1  
2  
3  
4 exercise for at least 30 minutes, and BP measurements were taken after the subjects  
5  
6 were allowed to rest quietly for at least 5 min. Three BP measurements (2 minutes  
7  
8 between each) were obtained for each individual by trained nurses, who were part of  
9  
10 the Health Management Center, with a mercury sphygmomanometer. The first and  
11  
12 fifth Korotkoff sounds were recorded as SBP and DBP respectively. During the  
13  
14 measurements, the participants were seated with the arm supported at the level of the  
15  
16 heart. The mean of 3 BP measurements was calculated and recorded.  
17  
18  
19  
20  
21  
22  
23

#### 24 **Definition of Correlative Risk Factors**

25  
26 Correlative risk factors estimated in our study included the following: (1) BP  
27  
28 classification was based on the recommendations from the JNC 7.<sup>1</sup> Optimal BP was  
29  
30 defined as SBP < 120 mm Hg and DBP < 80 mm Hg. Hypertension was defined as  
31  
32 SBP  $\geq$  140 mm Hg and/or DBP  $\geq$  90 mm Hg, or previously diagnosed as hypertension  
33  
34 and currently undergoing antihypertensive treatment. Prehypertension was defined if  
35  
36 individuals were not undergoing antihypertensive treatment and had a SBP of  
37  
38 120–139 mm Hg and/or DBP of 80–89 mm Hg. Prehypertension was further divided  
39  
40 into low-range (SBP 120–129 and/or DBP 80–84 mmHg) and high-range (SBP  
41  
42 130–139 mmHg and/or DBP 85–89 mmHg) subgroups. (2) Impaired glucose  
43  
44 regulation was diagnosed based on FPG according to the American Diabetes  
45  
46 Association criteria,<sup>10</sup> including diabetes (FPG  $\geq$  7.0 mmol/L) and impaired fasting  
47  
48 glucose (IFG, FPG 5.6–6.9 mmol/L). Dyslipidemia was defined as with a history of  
49  
50 receiving antidyslipidemia agents or TC  $\geq$  5.18 mmol/L, LDL-C  $\geq$  3.37 mmol/L,  
51  
52  
53  
54  
55  
56  
57  
58  
59  
60

1  
2  
3 HDL-C < 1.04 mmol/L, and/or TG  $\geq$  1.7 mmol/L, according to the 2007 Guidelines  
4  
5 for Prevention and Treatment of Dyslipidemia in Adults in China.<sup>11</sup> Hyperuricemia  
6  
7 was defined as UA  $\geq$  416  $\mu$ mol/L in men and 357  $\mu$ mol/L in women. (3) Overweight  
8  
9 and obesity were defined as body mass index (BMI) 24–27.9 kg/m<sup>2</sup> and BMI  $\geq$  28  
10  
11 kg/m<sup>2</sup> according to Chinese criteria.<sup>12</sup> (4) The estimated glomerular filtration rate  
12  
13 (eGFR) of each participant was estimated using the modified Modification of Diet in  
14  
15 Renal Disease equation adapted for Chinese,<sup>13</sup> as:  $eGFR = 186 \times Scr^{-1.154} \times Age^{-0.203}$   
16  
17  $\times 0.742$  (Female)  $\times 1.233$  (Chinese).  
18  
19  
20  
21  
22  
23  
24  
25  
26

### 27 **Statistical Analysis**

28  
29 Statistical analysis was performed using the Statistical Package for the Social  
30  
31 Science software release 16.0 (SPSS Inc., Chicago, IL, USA). Continuous variables  
32  
33 are presented as mean (standard deviation) or median (inter-quartile range) as  
34  
35 appropriate. Categorical variables are expressed as percentages. After testing for  
36  
37 normality using the Kolmogorov–Smirnov test, continuous variables were compared  
38  
39 using a *t*-test or the Mann–Whitney *U*-test, categorical variables were compared by  
40  
41 chi-square test or Fisher’s exact test as appropriate. Multiple logistic regression  
42  
43 analysis was performed to evaluate predictive factors for prehypertension. Individuals  
44  
45 with optimal BP were used as reference. Multicollinearity (strong correlations among  
46  
47 independent variables) was examined by collinearity diagnostic statistics. Variance  
48  
49 inflation factor values  $>2.5$  or tolerance  $<0.4$  may indicate concern for  
50  
51 multicollinearity in logistic regression models [14]. A value of  $P < 0.05$  was  
52  
53  
54  
55  
56  
57  
58  
59  
60

1  
2  
3  
4 considered statistically significant.

### 5 6 **Ethical clearance**

7  
8 The study was reviewed and approved by the Health Authority Research Ethics Board  
9  
10  
11 of the First People's Hospital of Shunde, Foshan, PR China.  
12

## 13 14 15 **Results**

### 16 17 **Prevalence of Prehypertension**

18  
19 Of the 5,362 cases (aged  $\geq 35$  years) initially reviewed, 651 cases were excluded  
20  
21 because of missing data. Finally, 4711 cases (2674 men, 2037 women) were analyzed.  
22  
23 The proportions of optimal BP, prehypertension, and hypertension were 39.1% (1842  
24  
25 cases), 38.6% (1819 cases), and 22.3% (1050 cases), respectively. The prevalence of  
26  
27 prehypertension was higher in men than in women (43.5% vs. 32.2%,  $P < 0.001$ ).  
28  
29 There was an increasing trend of prehypertension prevalence associated with age  
30  
31 (Table 1).  
32  
33  
34  
35  
36  
37  
38  
39  
40

### 41 42 **Risk Factors Clustering in Different Blood Pressure Statuses**

43  
44 The average age, proportion of male sex, family history of hypertension,  
45  
46 overweight, IFG, dyslipidemia, hyperuricemia, levels of FPG, TC, TG, BMI, and UA  
47  
48 were significantly higher in prehypertension and hypertension groups than in the  
49  
50 optimal BP group (all  $P < 0.05$ ). The proportions of DM, obesity, and level of LDL-C  
51  
52 were also higher in the hypertension group than in the optimal BP group (all  $P < 0.05$ );  
53  
54 however, the differences were not significant in the prehypertension group compared  
55  
56  
57  
58  
59  
60



1  
2  
3  
4 with that in the optimal BP group (Table 2)  
5  
6  
7

### 8 9 **Cardiovascular Risk Factors in Different Sub-ranges of Prehypertension**

10  
11 To explore the heterogeneity within the prehypertension category, patients with  
12 prehypertension were further classified into low- and high-range subgroups. The  
13 proportions of male sex, overweight, IFG, BMI, and levels of FPG were higher in the  
14 low-range prehypertension group than in the optimal BP group (all  $P < 0.05$ ), but  
15 there were no significant differences for other cardiovascular risk factors (all  $P >$   
16  $0.05$ ). The proportions of male sex, overweight, obesity, dyslipidemia, diabetes, IFG,  
17 hyperuricemia, BMI, and levels of TC, LDL-C, TG, FPG, and UA were higher in the  
18 high-range prehypertension group than in the optimal BP group (all  $P < 0.05$ ).  
19 Compared with low-range prehypertension, the proportions of overweight,  
20 dyslipidemia, and IFG were higher in the high-range prehypertension (all  $P < 0.05$ )  
21 (Table 3).  
22  
23  
24  
25  
26  
27  
28  
29  
30  
31  
32  
33  
34  
35  
36  
37  
38

### 39 **Risk Factors Associated with Prehypertension**

40  
41 The multivariable-adjusted risk factors associated with prehypertension are presented  
42 in Table 4. High BMI (overweight/obesity) was the most important risk factor of  
43 prehypertension [odds ratio ( $OR$ )=2.84, 95% confidence interval ( $CI$ )=1.55–5.20,  $P <$   
44  $0.001$ ]. Age (per 10 years,  $OR$ =1.21, 95%  $CI$ =1.02–1.44,  $P$ =0.03), male sex ( $OR$ =2.19,  
45 95%  $CI$ =1.39–3.45,  $P < 0.001$ ), and hyperuricemia ( $OR$ =1.70, 95%  $CI$ =1.14–2.54,  
46  $P$ =0.009) were also significantly associated with prehypertension. Furthermore,  
47 collinearity statistics were  $>0.4$  for tolerance and  $<2.5$  for variance inflation factor,  
48  
49  
50  
51  
52  
53  
54  
55  
56  
57  
58  
59  
60

1  
2  
3  
4 suggesting that multicollinearity was not a concern among the independent variables.  
5  
6  
7

## 8 **Discussion**

9  
10  
11 In this study, we found that prehypertension is highly prevalent in the Shunde  
12 District, Guangdong Province. Prehypertensive individuals presented with other risk  
13 factors associated with cardiovascular disease, such as overweight, dyslipidemia,  
14 impaired glucose, and hyperuricemia. Furthermore, combined cardiovascular risk  
15 factors were more significant in people with high-range prehypertension. To our  
16 knowledge, this is the first study to show that there was a significant heterogeneity of  
17 combined risk factors within the prehypertensive subgroups.  
18  
19  
20  
21  
22  
23  
24  
25  
26  
27

28  
29 Many epidemiological studies have demonstrated that prehypertension is an  
30 important public health problem. However, the prevalence of prehypertension in  
31 different countries and districts differs significantly, and may be influenced by  
32 different regional factors, such as climate and lifestyle, as well as ethnicity. At the  
33 beginning of this century (2000–2001), a cross-sectional survey found that the  
34 prevalence of prehypertension was 21.9% among Chinese subjects aged between 35  
35 and 74 years.<sup>3</sup> However, in other subsequent studies, the prevalence of  
36 prehypertension was significantly higher than this ratio. In rural northeastern China,  
37 the prevalence of prehypertension was 35.1% in men and 32.5% in women,<sup>15</sup> and up  
38 to 40% in whole population from urban areas of northeastern China,<sup>16</sup> which may be  
39 associated with the cold climate and high-sodium diet. In this study, we found that the  
40 prevalence of prehypertension in the Shunde District of Guangdong Province, a  
41  
42  
43  
44  
45  
46  
47  
48  
49  
50  
51  
52  
53  
54  
55  
56  
57  
58  
59  
60

1  
2  
3  
4 traditional but economically developed district of southern China, was up to 38.6%.  
5  
6 The prevalence was very similar to that in the urban areas of northeastern China,<sup>16</sup> and  
7  
8 significantly higher than the prevalence reported at the beginning of this century for  
9  
10 the entire country.<sup>3</sup> Further analysis showed that increased BMI was the most  
11  
12 important risk factor of prehypertension in our study. Even among patients with  
13  
14 low-range prehypertension, BMI was significantly increased compared with the  
15  
16 optimal BP group. Therefore, our study suggests that although sodium intake is  
17  
18 relatively low in Guangdong Province in southern China,<sup>17</sup> the prevalence of  
19  
20 prehypertension is almost as high as that in the northern area. With the economic  
21  
22 development and lifestyle changes, obesity/overweight has become a very important  
23  
24 risk factor for increased BP.  
25  
26  
27  
28  
29

30  
31 Although the proportions of IFG and dyslipidemia were higher in prehypertension  
32  
33 than optimal BP groups, in multivariable analysis, the associations of IFG and  
34  
35 dyslipidemia with prehypertension were not significant after adjustment for BMI.  
36  
37 Many studies have documented that overweight/obesity can cause significant insulin  
38  
39 resistance, which may play an important role in impaired glucose metabolism,  
40  
41 dyslipidemia, and increased BP.<sup>18, 19</sup> Clinical studies have shown that weight control  
42  
43 can significantly lower BP.<sup>20</sup> These results indicated that lifestyle modifications, such  
44  
45 as weight loss, are effective in the long-term primary prevention of hypertension.  
46  
47  
48  
49 With the economic development and lifestyle changes, lifestyle modifications should  
50  
51 be emphasized as a cornerstone in modern China.  
52  
53  
54

55  
56 Added to traditional risk factors, previous studies have found that serum UA  
57  
58  
59  
60

1  
2  
3  
4 levels were significantly associated with prehypertension.<sup>21, 22</sup> The mechanisms may  
5  
6 be associated with inhibition of the nitric oxide pathway and activation of the  
7  
8 renin-angiotensin system. Further, UA can cause proliferation of vascular smooth  
9  
10 muscle cells and renal microvascular damage because of local inflammation and  
11  
12 oxidative stress, finally leading to high BP.<sup>23, 24</sup> In our study, we found that the level  
13  
14 of UA tended to increase in the low-range prehypertension group ( $P = 0.07$ ), and the  
15  
16 difference was significant between high-range prehypertension and the optimal BP  
17  
18 groups. These results indicate that the effect of UA on BP may be increased  
19  
20 throughout the entire prehypertension range.  
21  
22  
23  
24

25  
26 In a recent randomized controlled trial, prehypertensive obese adolescents aged  
27  
28 11–17 years were enrolled and randomized to urate-lowering therapy (including  
29  
30 allopurinol or probenecid) or placebo. Subjects treated with urate-lowering therapy  
31  
32 experienced a highly significant reduction in BP (SBP 10.2 mm Hg and DBP 9.0 mm  
33  
34 Hg, respectively). Systemic vascular resistance was also reduced in the urate-lowering  
35  
36 therapy group.<sup>25</sup> These findings strongly supported the synergistic pathogenic role of  
37  
38 UA and obesity in hypertension. Genes and diet are important factors affecting the  
39  
40 levels of UA; therefore, we emphasize the importance of lifestyle modification  
41  
42 interventions for people with prehypertension.  
43  
44  
45  
46  
47  
48

49 It was interesting that there was significant ‘heterogeneity’ of combined  
50  
51 cardiovascular risk factors within the prehypertensive subgroups in our study.  
52  
53 Compared with optimal BP, BMI and FPG were increased in the low-range  
54  
55 prehypertension group and were increased even further in the high-range  
56  
57  
58  
59  
60

1  
2  
3  
4 prehypertension group. Furthermore, the proportions of overweight, dyslipidemia, and  
5  
6 IFG were higher in the high-range prehypertension than those in the low-range  
7  
8 prehypertension groups. These findings confirmed the importance of the definition of  
9  
10 prehypertension, as well as the inhomogeneity of the prehypertension subcategories.  
11  
12 Our prior meta analysis also found that prehypertension was associated with increased  
13  
14 risks of CVD<sup>26</sup> and end-stage renal disease.<sup>27</sup> However, because of limit prospective,  
15  
16 randomized trials examining the effects of anti-hypertensive therapy on reducing  
17  
18 target organ damage specifically in prehypertension, currently professional societies  
19  
20 do not recommend pharmacotherapy for prehypertension, even in individuals with  
21  
22 high-range prehypertension.<sup>28,29</sup> This is a great gap to be covered between  
23  
24 epidemiological studies and randomized controlled studies in prehypertension.  
25  
26 Prehypertensive individuals are at a high risk to progress to sustained hypertension, as  
27  
28 well as CVD and renal damage. So periodic screening is important. For therapeutic  
29  
30 implications, we consider that healthcare professionals should recommend lifestyle  
31  
32 changes to subjects with prehypertension. Furthermore, high-risk subpopulations with  
33  
34 prehypertension, especially those with high-range prehypertension should be selected  
35  
36 for future controlled trials to evaluate the effects of pharmacological treatment on this  
37  
38 population.  
39  
40  
41  
42  
43  
44  
45  
46  
47

48  
49 Several limitations of this study must be considered. First, our data were based  
50  
51 on community-based health checkup information, and not from a multi-stage stratified  
52  
53 clustering sample. This may cause bias of the prevalence of prehypertension. Second,  
54  
55 some important confounding factors possibly associated with increased BP, such as  
56  
57  
58  
59  
60

1  
2  
3  
4 diet, physical activity, and socioeconomic factors, were not evaluated in the present  
5  
6 study. Third, follow up data of individuals with prehypertension were lack and further  
7  
8 studies were needed on the matter.  
9

### 10 11 12 13 **Conclusion**

14  
15 This study showed that accompanied with the economic development and lifestyle  
16  
17 changes, prehypertension is highly prevalent in the Shunde District, southern China.  
18  
19 Many other cardiovascular risk factors were presented in individuals with  
20  
21 prehypertension, especially in those with high-range prehypertension. Periodic  
22  
23 screening and lifestyle changes should be recommended to subjects with  
24  
25 prehypertension for prevention of hypertension, as well as cardiovascular disease.  
26  
27  
28  
29  
30  
31  
32

33 **Contributors** YulH, YunH, and DX conceptualised the study, designed the protocol.  
34  
35 YulH, WQ and XC analysed the data and drafted the manuscript. CL, DZ, JH  
36  
37 collected the data. YW, YunH, and DX revised the manuscript. YunH and DX  
38  
39 participated in administrative and technical support.  
40  
41

42 **Funding** This research received no specific grant from any funding agency in the  
43  
44 public, commercial or not-for-profit sectors.  
45  
46

47 **Competing interests** None.  
48  
49

50 **Data Sharing Statement:** No additional data available  
51  
52  
53  
54  
55  
56  
57  
58  
59  
60

**References:**

1. Chobanian AV, Bakris GL, Black HR, *et al.* The Seventh Report of the Joint National Committee on Prevention, Detection, Evaluation, and Treatment of High Blood Pressure: the JNC 7 report. *JAMA* 2003; 289: 2560-72.
2. Sun Z, Zheng L, Xu C, *et al.* Prevalence of prehypertension, hypertension and associated risk factors in Mongolian and Han Chinese populations in Northeast China. *Int J Cardiol* 2008; 128: 250-4.
3. Yu D, Huang J, Hu D, *et al.* Prevalence and risk factors of prehypertension among Chinese adults. *J Cardiovasc Pharmacol* 2008; 52: 363-8.
4. Sun Z, Zheng L, Wei Y, *et al.* Prevalence and risk factors of the rural adult people prehypertension status in Liaoning Province of China. *Circ J* 2007; 71: 550-3.
5. Liu LS [2010 Chinese guidelines for the management of hypertension]. *Zhonghua Xin Xue Guan Bing Za Zhi* 2011; 39: 579-615.
6. Elliott WJ, Black HR Prehypertension. *Nat Clin Pract Cardiovasc Med* 2007; 4: 538-48.
7. Egan BM, Lackland DT, Jones DW. Prehypertension: an opportunity for a new public health paradigm. *Cardiol Clin* 2010; 28: 561-9.
8. Pimenta E, Oparil S Prehypertension: epidemiology, consequences and treatment. *Nat Rev Nephrol* 2010; 6: 21-30.
9. Gupta P, Nagaraju SP, Gupta A, Mandya CK. Prehypertension - time to act. *Saudi J Kidney Dis Transpl* 2012; 23: 223-33.
10. Expert Committee on the Diagnosis and Classification of Diabetes Mellitus.

1  
2  
3  
4 Report of the Expert Committee on the Diagnosis and Classification of Diabetes  
5 Mellitus. *Diabetes Care* 2003; 26 Suppl 1: S5-S20.

6  
7  
8  
9 **11.** Joint Committee for Developing Chinese guidelines on Prevention and Treatment  
10 of Dyslipidemia in Adults. [Chinese guidelines on prevention and treatment of  
11 dyslipidemia in adults]. *Zhonghua Xin Xue Guan Bing Za Zhi* 2007; 35: 390-419.

12  
13  
14  
15  
16 **12.** Zhou B. [Predictive values of body mass index and waist circumference to risk  
17 factors of related diseases in Chinese adult population]. *Zhonghua Liu Xing Bing Xue*  
18 *Za Zhi* 2002; 23: 5-10.

19  
20  
21  
22  
23  
24 **13.** Ma YC, Zuo L, Chen JH, *et al*: Modified glomerular filtration rate estimating  
25 equation for Chinese patients with chronic kidney disease. *J Am Soc Nephrol* 2006; 17:  
26 2937-44.

27  
28  
29  
30  
31 **14.** Pallant J. SPSS survival manual: a step by step guide to data analysis using SPSS  
32 for windows (version 10). Open University Press; 2001.

33  
34  
35  
36  
37  
38  
39 **15.** Li Z, Guo X, Zheng L, *et al*. Prehypertension in rural northeastern china: results  
40 from the northeast china rural cardiovascular health study. *J Clin Hypertens (Greenwich)*  
41 2014;16:664-70.

42  
43  
44  
45  
46  
47  
48 **16.** Dong GH, Wang D, Liu MM, *et al*. Sex difference of the prevalence and risk  
49 factors associated with prehypertension among urban Chinese adults from 33  
50 communities of China: the CHPSNE study. *J Hypertens* 2012; 30: 485-91.

51  
52  
53  
54  
55 **17.** Cheng TO. Systolic and diastolic blood pressures and urinary sodium excretion in  
56 mainland China. *QJM* 2000; 93: 557-8.

57  
58  
59  
60 **18.** Tobias DK, Pan A, Jackson CL, *et al*. Body-mass index and mortality among



- adults with incident type 2 diabetes. *N Engl J Med* 2014; 370: 233-44.
19. Gillman MW, Ludwig DS. How early should obesity prevention start? *N Engl J Med* 2013; 369: 2173-5.
20. Tyson CC, Appel LJ, Vollmer WM, *et al.* Impact of 5-year weight change on blood pressure: results from the Weight Loss Maintenance trial. *J Clin Hypertens*. 2013;15:458-64.
21. Liang J, Xue Y, Zou C, Zhang T, Song H, Qi L. Serum uric acid and prehypertension among Chinese adults. *J Hypertens* 2009; 27: 1761-5.
22. Kawamoto R, Tabara Y, Kohara K, Kusunoki T, Abe M, Miki T. Interaction between serum uric acid and triglycerides in relation to prehypertension in community-dwelling Japanese adults. *Clin Exp Hypertens* 2014; 36: 64-9.
23. Soltani Z, Rasheed K, Kapusta DR, Reisin E. Potential role of uric acid in metabolic syndrome, hypertension, kidney injury, and cardiovascular diseases: is it time for reappraisal? *Curr Hypertens Rep* 2013; 15: 175-81.
24. Reynolds TM. Serum uric acid and new-onset hypertension: a possible therapeutic avenue? *J Hum Hypertens* 2014;28:519-20.
25. Soletsky B, Feig DI. Uric acid reduction rectifies prehypertension in obese adolescents. *Hypertension* 2012; 60: 1148-56.
26. Huang Y, Wang S, Cai X, *et al.* Prehypertension and incidence of cardiovascular disease: a meta analysis. *BMC Med* 2013;11:177.
27. Huang Y, Cai X, Zhang J, *et al.* Prehypertension and Incidence of ESRD: A Systematic Review and Meta analysis. *Am J Kidney Dis* 2014;63:76-83.

1  
2  
3  
4 28. James P A, Oparil S, Carter B L, et al. 2014 Evidence-Based Guideline for the  
5  
6 Management of High Blood Pressure in Adults: Report From the Panel Members  
7  
8 Appointed to the Eighth Joint National Committee (JNC 8)[J]. *JAMA*  
9  
10 2014;311:507-20.  
11

12  
13 29. Mancia G, Fagard R, Narkiewicz K, et al. 2013 ESH/ESC Guidelines for the  
14  
15 management of arterial hypertension: The Task Force for the management of arterial  
16  
17 hypertension of the European Society of Hypertension (ESH) and of the European  
18  
19 Society of Cardiology (ESC)[J]. *Eur Heart J* 2013;34:2159-219.  
20  
21  
22  
23  
24  
25  
26  
27  
28  
29  
30  
31  
32  
33  
34  
35  
36  
37  
38  
39  
40  
41  
42  
43  
44  
45  
46  
47  
48  
49  
50  
51  
52  
53  
54  
55  
56  
57  
58  
59  
60

Table 1 Prevalence of Prehypertension and Hypertension by Sex and Age Group

| Age (years)   | n    | Optimal BP (%) | Prehypertension (%) | Hypertension (%) |
|---------------|------|----------------|---------------------|------------------|
| <b>Male</b>   |      |                |                     |                  |
| 35~49         | 970  | 48.1           | 34.4                | 17.4             |
| 50~64         | 996  | 27.1           | 48.0                | 24.9             |
| ≥ 65          | 708  | 20.6           | 49.6                | 29.8             |
| Total         | 2037 | 33.0           | 43.5                | 23.5             |
| <b>Female</b> |      |                |                     |                  |
| 35~49         | 758  | 59.8           | 26.5                | 12.9             |
| 50~64         | 797  | 42.3           | 36.3                | 22.2             |
| ≥ 65          | 482  | 35.1           | 34.4                | 30.5             |
| Total         | 2674 | 47.1           | 32.2                | 20.7             |
| <b>All</b>    |      |                |                     |                  |
| 35~49         | 1728 | 53.2           | 31.0                | 15.5             |
| 50~64         | 1793 | 33.9           | 42.8                | 23.7             |
| ≥ 65          | 1190 | 26.5           | 43.4                | 30.1             |
| Total         | 4711 | 39.1           | 38.6                | 22.3             |

BP: blood pressure

**Table 2 Cardiovascular Risk Factors in Different Blood Pressure Statuses**

|                                        | Optimal BP<br>(n=1842) | Prehypertension<br>(n=1819) | Hypertension<br>(n=1050) | <i>P</i> |
|----------------------------------------|------------------------|-----------------------------|--------------------------|----------|
| Age (years)                            | 48.8±10.5              | 52.1±11.3 <sup>△</sup>      | 54.3±10.4 <sup>△</sup>   | 0.008    |
| Male [n (%)]                           | 829 (45.0)             | 1163 (63.9) <sup>△</sup>    | 628 (59.8) <sup>△§</sup> | <0.001   |
| Smoking [n (%)]                        | 301 (16.3)             | 287 (15.8)                  | 186 (17.7)               | 0.77     |
| Alcoholic [n (%)]                      | 35 (1.9)               | 42 (2.3)                    | 27 (2.6)                 | 0.464    |
| Family history of Hypertension [n (%)] | 274 (14.9)             | 292 (16.1) <sup>△</sup>     | 203 (19.3) <sup>△§</sup> | 0.007    |
| Overweight [n (%)]                     | 236 (12.8)             | 395(21.7) <sup>△</sup>      | 241(23.0) <sup>△</sup>   | <0.001   |
| Obesity [n (%)]                        | 128(6.9)               | 156(8.6)                    | 98(9.3) <sup>△</sup>     | 0.019    |
| BMI (kg/m <sup>2</sup> )               | 21.6±3.2               | 24.9±3.5 <sup>△</sup>       | 25.6±4.8 <sup>△</sup>    | 0.001    |
| Dyslipidemia [n (%)]                   | 420(22.8)              | 488(26.8) <sup>△</sup>      | 312(29.7) <sup>△§</sup>  | <0.001   |
| TC (mmol/L)                            | 5.02±1.25              | 5.39±1.67 <sup>△</sup>      | 5.64±1.59 <sup>△§</sup>  | 0.01     |
| LDL-C (mmol/L)                         | 3.21±1.15              | 3.45±1.18                   | 3.68±1.32 <sup>△</sup>   | 0.03     |
| HDL-C (mmol/L)                         | 1.18±0.36              | 1.09±0.38                   | 1.02±0.41                | 0.75     |
| TG(mmol/L)                             | 1.66±0.42              | 2.07±0.58 <sup>△</sup>      | 2.09±0.63 <sup>△</sup>   | 0.001    |
| DM [n (%)]                             | 138(7.5)               | 168(9.2)                    | 109(10.4) <sup>△</sup>   | 0.002    |
| IFG [n (%)]                            | 261(14.2%)             | 384(21.1%) <sup>△</sup>     | 275(26.2) <sup>△§</sup>  | <0.001   |
| FPG (mmol/L)                           | 5.14±1.96              | 5.79±2.03 <sup>△</sup>      | 5.91±2.27 <sup>△</sup>   | 0.003    |
| Scr (mmol/L)                           | 72.2±19.7              | 75.0±25.1                   | 79.2±28.9                | 0.14     |
| BUN (mmol/L)                           | 5.34±1.71              | 6.01±1.87                   | 6.25±1.99                | 0.35     |
| eGFR (ml/min/1.73 m <sup>2</sup> )     | 126.8±27.9             | 125.2±29.4                  | 118.1±28.6               | 0.76     |
| Hyperuricemia [n (%)]                  | 233(12.6%)             | 302(16.6%) <sup>△</sup>     | 226(21.5) <sup>△§</sup>  | 0.001    |
| UA (mmol/L)                            | 377.5±32.2             | 402.9±34.6 <sup>△</sup>     | 428.1±33.8 <sup>△§</sup> | 0.007    |

BP, blood pressure; BMI, body mass index; TC, total cholesterol; LDL-C, low-density lipoprotein cholesterol;

HDL-C, high-density lipoprotein cholesterol; TG, triglycerides; IFG, impaired fasting glucose; Scr, serum

creatinine; BUN, blood urea nitrogen; eGFR, estimated glomerular filtration rate; UA, serum uric acid

△ vs. Optimal blood pressure *P* < 0.05, § vs. prehypertension *P* < 0.05

**Table 3 Cardiovascular Risk Factors Different Sub-ranges of Prehypertension**

|                                        | Low range prehypertension<br>(n=925) | High<br>prehypertension (n=894) | range <i>P</i> |
|----------------------------------------|--------------------------------------|---------------------------------|----------------|
| Age (years)                            | 50.6±11.2                            | 53.7±12.4 <sup>#</sup>          | 0.08           |
| Male [n (%)]                           | 584 (63.1%) <sup>#</sup>             | 579 (64.8%) <sup>#</sup>        | 0.47           |
| Smoking [n (%)]                        | 149 (16.1%)                          | 138 (15.4%)                     | 0.69           |
| Alcoholic [n (%)]                      | 20 (1.9%)                            | 22 (2.7%)                       | 0.29           |
| Family history of Hypertension [n (%)] | 153 (16.5%)                          | 139 (15.5%)                     | 0.56           |
| Overweight [n (%)]                     | 183 (19.8%) <sup>#</sup>             | 212 (23.7%) <sup>#</sup>        | 0.04           |
| Obesity [n (%)]                        | 75 (8.1%)                            | 81(9.1%) <sup>*</sup>           | 0.47           |
| BMI (kg/m <sup>2</sup> )               | 23.7±3.3 <sup>*</sup>                | 26.1±3.9 <sup>#</sup>           | <0.001         |
| Dyslipidemia [n (%)]                   | 227 (24.5%)                          | 261 (29.2%) <sup>#</sup>        | 0.025          |
| TC (mmol/L)                            | 5.25±1.38                            | 5.53±1.70 <sup>#</sup>          | 0.04           |
| LDL-C (mmol/L)                         | 3.33±1.08                            | 3.58±1.19 <sup>*</sup>          | 0.10           |
| HDL-C (mmol/L)                         | 1.14±0.35                            | 1.03±0.37                       | 0.69           |
| TG(mmol/L)                             | 1.81±0.56                            | 2.34±0.67 <sup>*</sup>          | 0.12           |
| DM [n (%)]                             | 78 (8.4%)                            | 90 (10.1%) <sup>*</sup>         | 0.23           |
| IFG [n (%)]                            | 171 (18.5%) <sup>#</sup>             | 213 (23.8%) <sup>#</sup>        | 0.005          |
| FPG (mmol/L)                           | 5.52±1.91 <sup>*</sup>               | 6.07±2.05 <sup>#</sup>          | 0.002          |
| Scr (mmol/L)                           | 76.1±29.4                            | 73.8±27.0                       | 0.18           |
| BUN (mmol/L)                           | 5.98±2.02                            | 6.04±1.79                       | 0.37           |
| eGFR (ml/min/1.73 m <sup>2</sup> )     | 128.7±30.6                           | 121.6±28.4                      | 0.29           |
| Hyperuricemia [n (%)]                  | 140 (15.1%)                          | 162 (18.1%) <sup>#</sup>        | 0.09           |
| UA (mmol/L)                            | 392.5±40.2                           | 411.8±37.9 <sup>#</sup>         | 0.08           |

BMI, body mass index; TC, total cholesterol; LDL-C, low-density lipoprotein cholesterol; HDL-C, high-density lipoprotein cholesterol; TG, triglycerides; IFG, impaired fasting glucose; Scr, serum creatinine; BUN, blood urea nitrogen; eGFR, estimated glomerular filtration rate; UA, serum uric acid

\* vs optimal blood pressure  $P < 0.05$ , # vs Optimal blood pressure  $P < 0.01$

**Table 4 Multivariate Logistic Regression Analysis for Risk Factors of Prehypertension**

| <b>Risk Factors</b>                        | <i>OR</i> | <i>95%CI</i> | <i>P</i> 值 |
|--------------------------------------------|-----------|--------------|------------|
| Age (per 10 years)                         | 1.21      | 1.02~1.44    | 0.03       |
| Sex (Men vs Women)                         | 2.19      | 1.39~3.45    | < 0.001    |
| Smoking (Yes vs No)                        | 0.97      | 0.70~1.34    | 0.85       |
| Alcoholic (Yes vs No)                      | 1.12      | 0.89~1.41    | 0.33       |
| Family history of Hypertension (Yes vs No) | 1.29      | 0.88~1.89    | 0.19       |
| overweight/obesity (Yes vs No)             | 2.84      | 1.55~5.20    | < 0.001    |
| Dyslipidemia (Yes vs No)                   | 1.58      | 0.92~2.71    | 0.09       |
| Impaired glucose regulation (Yes vs No)    | 1.64      | 0.96~2.81    | 0.07       |
| Hyperuricemia (Yes vs No)                  | 1.70      | 1.14~2.54    | 0.009      |

Prehypertension was defined if individuals were not undergoing antihypertensive treatment and had a SBP of 120–139 mm Hg and/or DBP of 80–89 mm Hg. Individuals with optimal blood pressure (SBP < 120 mm Hg and DBP < 80 mm Hg) were used as reference.

1  
2  
3  
4  
5  
6  
7 **Prevalence and Risk Factors Associated with Prehypertension in**  
8 **Shunde District, Southern China**  
9  
10

11  
12  
13 Running head: Prevalence and Risk Factors of Prehypertension  
14  
15

16  
17 Yuli Huang,<sup>1,2\*</sup> Wenke Qiu,<sup>3\*</sup> Changhua Liu,<sup>1</sup> Dingji Zhu,<sup>1</sup> Jinghai Hua,<sup>1</sup> Xiaoyan  
18 Cai,<sup>2</sup> Yanxian Wu,<sup>2</sup> Yunzhao Hu,<sup>2</sup> Dingli Xu<sup>1</sup>  
19  
20

21  
22 <sup>1</sup> Department of Cardiology, Nanfang Hospital, Southern Medical University,  
23 Guangzhou, PR China; <sup>2</sup> Department of Cardiology, the First People's Hospital of  
24 Shunde, Foshan, PR China; <sup>3</sup> Department of Health Management Center, the First  
25 People's Hospital of Shunde, PR China  
26  
27  
28  
29  
30  
31

32  
33 \* The authors contributed equally to this work  
34

35 Corresponding author: Professor Dingli Xu. Department of Cardiology, Nanfang  
36 Hospital, Southern Medical University, Guangzhou, PR China. Tel.: + 86 20  
37 61641503 Fax: + 86 20 87705671 E-mail: [dinglixu@fimmu.com](mailto:dinglixu@fimmu.com) Or Professor  
38 Yunzhao Hu, Department of Cardiology, the First People's Hospital of Shunde,  
39 Foshan, PR China. Tel.: + 86 757 22318680 Fax: + 86 757 22223899 E-mail:  
40 [huyunzhao4406@163.com](mailto:huyunzhao4406@163.com)  
41  
42  
43  
44  
45  
46  
47  
48  
49  
50  
51  
52  
53  
54  
55  
56  
57  
58  
59  
60

**ABSTRACT**

**OBJECTIVE:** To explore the ~~incidence~~prevalence and combined cardiovascular risk factors of prehypertension in southern China.

**DESIGN:** A ~~retrospective cross-sectional~~ study; the logistic regression model was used to find the risk factors of prehypertension.

**SETTING:** The study was conducted in Shunde District, Southern China, using the community-based health checkup information.

**PARTICIPANTS:** Subjects aged  $\geq 35$  years with complete health checkup information data between January 2011 and December 2013 were enrolled and divided into hypertension, prehypertension, and optimal blood pressure (BP). Prehypertension was further divided into low-range (BP 120-129/80-84 mmHg) and high-range (BP 130-139/85-89 mmHg) subgroups.

**OUTCOME MEASURES:** The prevalence of prehypertension and the combined cardiovascular risk factors within the prehypertensive subgroups.

**RESULTS:** Of the 5,362 initially reviewed cases (aged  $\geq 35$  years), 651 cases were excluded because of missing data. The proportions of optimal BP, prehypertension, and hypertension were 39.1%, 38.6%, and 22.3%, respectively. The average age, proportion of male sex, overweight, impaired fasting glucose (IFG), dyslipidemia, and hyperuricemia were significantly higher in the prehypertension group than in the optimal BP group (all  $P < 0.05$ ). Compared with low-range prehypertension, the proportions of overweight, dyslipidemia, and IFG were higher in the high-range prehypertension group (all  $P < 0.05$ ). Multivariate logistic regression analysis showed that overweight [odds ratio (OR) = 2.8984, 95% confidence interval (CI) = 1.5655–5.3520], male sex (OR = 2.4519, 95% CI = 1.3739–3.3745), age (per 10 years, OR=1.21, 95% CI=1.02–1.44, P=0.03) and hyperuricemia (OR = 1.6970, 95% CI =



1  
2  
3  
4  
5  
6 1.4814–2.6454) were independent risk factors of prehypertension.  
7  
8  
9

10 **CONCLUSIONS:** Prehypertension is highly prevalent in southern China.  
11 Prehypertensive individuals presented with many other cardiovascular risk factors.  
12 There was heterogeneity of combined risk factors within the prehypertensive  
13 subgroups.  
14  
15  
16  
17

18 **Keywords:** Prehypertension; Prevalence; Risk Factors  
19  
20  
21  
22  
23  
24  
25  
26  
27  
28  
29  
30  
31  
32  
33  
34  
35  
36  
37  
38  
39  
40  
41  
42  
43  
44  
45  
46  
47  
48  
49  
50  
51  
52  
53  
54  
55  
56  
57  
58  
59  
60

**Strengths and limitations of this study**

- This study first documented prehypertension is highly prevalent in the Shunde District, southern China.
- With the economic development and lifestyle changes in China, obesity/overweight has become a very important risk factor for increased blood pressure.
- This is the first study to show that there was a significant heterogeneity of combined risk factors within the prehypertensive subgroups.
- Some important confounding factors possibly associated with increased blood pressure were not evaluated in the present study.

## Introduction

In 2003, the seventh report of the Joint National Committee on Prevention, Detection, Evaluation, and Treatment of High Blood Pressure (JNC 7) proposed a new blood pressure (BP) category, including 120–139 mmHg systolic blood pressure (SBP) or 80–89 mmHg diastolic blood pressure (DBP), designated as “prehypertension”.<sup>1</sup>

The ~~prevalence~~~~incidence~~ of prehypertension is up to 30–50% worldwide, as well as in many districts of China.<sup>2-4</sup> It is known that in China, the ~~prevalence~~~~incidence~~ of hypertension is significantly higher in the northern than that in the southern area because of the colder climate and high-sodium intake.<sup>5</sup> Such regional factors may also affect the ~~prevalence~~~~incidence~~ of prehypertension. However, the ~~prevalence~~~~incidence~~ of prehypertension in Guangdong Province, southern China has been rarely reported.

Prehypertensive individuals are prone to progress into frank hypertension, and most of them present with clustering of other cardiovascular risk factors.<sup>6-8</sup> However, the term of “prehypertension” has been contentious. Most arguments against using this term consist of the possible public anxiety and overtreatment it may cause. Further, there is a high heterogeneity within this category because the risk of progressing to hypertension and developing cardiovascular disease is higher among people with BP 130–139/85–89 mmHg than among those with BP 120–129/80–84 mmHg.<sup>6, 9</sup> Furthermore, whether the concurrent cardiovascular risk factors in subgroups of prehypertension are different remains unanswered.

Given these inconsistent results, we conducted a retrospective analysis to explore the prevalence of prehypertension, and the cardiovascular risk factors in the

1  
2  
3  
4  
5  
6  
7 sub-groups of prehypertension in Guangdong Province, southern China.  
8  
9

## 10 11 **Methods**

### 12 13 **Study Participants**

14  
15 We performed a retrospective study in Shunde District, a traditional but  
16 economically developed district of Guangdong Province, in China, using the  
17 community-based health checkup information. Community-based health checkup  
18 information was collected in the Health Management Center of the First People's  
19 Hospital of Shunde. The centers provided data for participants who enrolled in their  
20 health checkup programs conducted between January 2011 and December 2013.  
21  
22 Subjects aged  $\geq 35$  years with complete data for the following characteristics were  
23 included in this study: age, sex, smoking/drinking habits, history of chronic diseases  
24 and treatment, family history of hypertension, height, weight, BP, fasting plasma  
25 glucose (FPG), total cholesterol (TC), triglycerides (TG), low density  
26 lipoprotein-cholesterol (LDL-C), high-density lipoprotein-cholesterol (HDL-C),  
27 serum creatinine (Scr), blood urea nitrogen (BUN), and serum uric acid (UA). ~~This  
28 study was approved by the Ethics Committee of the Affiliated Hospital at Shunde of  
29 the Southern Medical University.~~  
30  
31  
32  
33  
34  
35  
36  
37  
38  
39  
40  
41  
42  
43  
44  
45  
46  
47  
48

### 49 **Blood pressure measurement**

50  
51 ~~Although our data were based on retrospective analysis of community-based~~  
52 ~~health checkup information, the protocol of blood pressure measurement in our Health~~  
53  
54  
55  
56  
57  
58  
59  
60

1  
2  
3  
4  
5  
6  
7 Management Center are carried out consistently since the foundation of the  
8 department. Subjects were asked to avoid caffeinated beverages, smoking and  
9 exercise for at least 30 minutes, and BP measurements were taken after the subjects  
10 were allowed to rest quietly for at least 5 min. Three BP measurements (2 minutes  
11 between each) were obtained for each individual by trained nurses, who were part of  
12 the Health Management Center, with a mercury sphygmomanometer. The first and  
13 fifth Korotkoff sounds were recorded as SBP and DBP respectively. During the  
14 measurements, the participants were seated with the arm supported at the level of the  
15 heart. The mean of 3 BP measurements was calculated and recorded.  
16  
17  
18  
19  
20  
21  
22  
23  
24  
25  
26  
27  
28

### 29 **Definition of Correlative Risk Factors**

30  
31 Correlative risk factors estimated in our study included the following: (1) BP  
32 classification was based on the recommendations from the JNC 7.<sup>1</sup> ~~Normal-Optimal~~  
33 BP was defined as SBP < 120 mm Hg and DBP < 80 mm Hg. Hypertension was  
34 defined as SBP ≥ 140 mm Hg and/or DBP ≥ 90 mm Hg, or previously diagnosed as  
35 hypertension and currently undergoing antihypertensive treatment. Prehypertension  
36 was defined if ~~patients-individuals~~ were not undergoing antihypertensive treatment  
37 and had a SBP of 120–139 mm Hg and/or DBP of 80–89 mm Hg. Prehypertension  
38 was further divided into low-range (SBP 120–129 and/or DBP 80–84 mmHg) and  
39 high-range (SBP 130–139 mmHg and/or DBP 85–89 mmHg) subgroups. (2) Impaired  
40 glucose regulation was diagnosed based on FPG according to the American Diabetes  
41 Association criteria,<sup>10</sup> including diabetes (FPG ≥ 7.0 mmol/L) and impaired fasting  
42  
43  
44  
45  
46  
47  
48  
49  
50  
51  
52  
53  
54  
55  
56  
57  
58  
59  
60

1  
2  
3  
4  
5  
6  
7 glucose (IFG, FPG 5.6–6.9 mmol/L). Dyslipidemia was defined as with a history of  
8  
9 receiving antidyshlipidemia agents or TC ≥ 5.18 mmol/L, LDL-C ≥ 3.37 mmol/L,  
10  
11 HDL-C < 1.04 mmol/L, and/or TG ≥ 1.7 mmol/L~~history of receiving~~  
12  
13 ~~antidyshlipidemia agents or as satisfying criteria on admission such as TC ≥ 5.18~~  
14  
15 ~~mmol/L, LDL-C ≥ 3.37 mmol/L, HDL-C < 1.04 mmol/L, and/or TG ≥ 1.7 mmol/L,~~

16  
17 according to the 2007 Guidelines for Prevention and Treatment of Dyslipidemia in  
18 Adults in China.<sup>11</sup> Hyperuricemia was defined as UA ≥ 416 μmol/L in men and 357  
19  
20 μmol/L in women. (3) Overweight and obesity were defined as body mass index  
21  
22 (BMI) 24–27.9 kg/m<sup>2</sup> and BMI ≥ 28 kg/m<sup>2</sup> according to Chinese criteria.<sup>12</sup> (4) The  
23  
24 estimated glomerular filtration rate (eGFR) of each participant was estimated using  
25  
26 the modified Modification of Diet in Renal Disease equation adapted for Chinese,<sup>13</sup> as:  
27  
28  
29  
30  
31  
32 eGFR = 186 × Scr<sup>-1.154</sup> × Age<sup>-0.203</sup> × 0.742 (Female) × 1.233 (Chinese).

### 33 34 35 36 **Statistical Analysis**

37  
38 Statistical analysis was performed using the Statistical Package for the Social  
39  
40 Science software release 16.0 (SPSS Inc., Chicago, IL, USA). Continuous variables  
41  
42 are presented as mean ±(standard deviation) or median (inter-quartile range) as  
43  
44 appropriate. Categorical variables are expressed as percentages. After testing for  
45  
46 normality using the Kolmogorov–Smirnov test, continuous variables were compared  
47  
48 using a *t*-test or the Mann–Whitney *U*-test, categorical variables were compared by  
49  
50 chi-square test or Fisher’s exact test as appropriate. Multiple logistic regression  
51  
52 analysis was performed to evaluate predictive factors for prehypertension. Individuals  
53  
54  
55  
56  
57  
58  
59  
60

1  
2  
3  
4  
5  
6  
7 with optimal BP were used as reference. Multicollinearity (strong correlations among  
8 independent variables) was examined by collinearity diagnostic statistics. Variance  
9 inflation factor values >2.5 or tolerance <0.4 may indicate concern for  
10 multicollinearity in logistic regression models [14]. A value of  $P < 0.05$  was  
11 considered statistically significant.  
12  
13  
14  
15  
16

### 17 **Ethical clearance**

18  
19  
20 The study was reviewed and approved by the Health Authority Research Ethics Board  
21 of ~~the Affiliated Hospital at Shunde (the First People's Hospital of Shunde), Southern~~  
22 ~~Medical University Foshan~~, PR China.  
23  
24  
25  
26  
27

## 28 **Results**

### 29 **Prevalence of Prehypertension**

30  
31  
32 Of the 5,362 cases (aged  $\geq 35$  years) initially reviewed, 651 cases were excluded  
33 because of missing data. Finally, 4711 cases (2674 men, 2037 women) were analyzed.  
34  
35  
36 The proportions of optimal BP, prehypertension, and hypertension were 39.1% (1842  
37 cases), 38.6% (1819 cases), and 22.3% (1050 cases), respectively. The  
38 ~~prevalence~~ ~~incidence~~ of prehypertension was higher in men than in women (43.5% vs.  
39 32.2%,  $P < 0.001$ ). There was an increasing trend of prehypertension prevalence  
40 associated with age ~~in men, but in women, the prevalence of prehypertension~~  
41 ~~increased up to the age of 50–64 years and then decreased~~ (Table 1).  
42  
43  
44  
45  
46  
47  
48  
49  
50  
51  
52

### 53 **Risk Factors Clustering in Different Blood Pressure Statuses**

54  
55  
56  
57  
58  
59  
60

1  
2  
3  
4  
5  
6  
7 The average age, proportion of male sex, family history of hypertension,  
8  
9 overweight, IFG, dyslipidemia, hyperuricemia, levels of FPG, TC, TG, BMI, and UA  
10  
11 were significantly higher in prehypertension and hypertension groups than in the  
12  
13 optimal BP group (all  $P < 0.05$ ). The proportions of DM, obesity, and levels of LDL-C  
14  
15 were also higher in the hypertension groups than in the optimal BP group (all  $P <$   
16  
17 0.05); however, the differences were not significant in the prehypertension group  
18  
19 compared with that in the optimal BP group (Table 2)  
20  
21  
22  
23

#### 24 **Cardiovascular Risk Factors in Different Sub-ranges of Prehypertension**

25  
26 To explore the heterogeneity within the prehypertension category, patients with  
27  
28 prehypertension were further classified into low- and high-range subgroups. The  
29  
30 proportions of male sex, overweight, IFG, BMI, and levels of FPG were higher in the  
31  
32 low-range prehypertension group than in the optimal BP group (all  $P < 0.05$ ), but  
33  
34 there were no significant differences for other cardiovascular risk factors (all  $P >$   
35  
36 0.05). The proportions of male sex, overweight, obesity, dyslipidemia, diabetes, IFG,  
37  
38 hyperuricemia, BMI, and levels of TC, LDL-C, TG, FPG, and UA were higher in the  
39  
40 high-range prehypertension group than in the optimal BP group (all  $P < 0.05$ ).  
41  
42 Compared with low-range prehypertension, the proportions of overweight,  
43  
44 dyslipidemia, and IFG were higher in the high-range prehypertension (all  $P < 0.05$ )  
45  
46  
47  
48  
49 (Table 3).  
50  
51  
52  
53

#### 54 **Risk Factors Associated with Prehypertension**

55  
56  
57  
58  
59  
60



1  
2  
3  
4  
5  
6  
7 The multivariable-adjusted risk factors associated with prehypertension are presented  
8  
9 in Table 4. High BMI (overweight/obesity) was the most important risk factor of  
10  
11 prehypertension [odds ratio (OR)=2.8984, 95% confidence interval  
12  
13 (CI)=1.5655–5.3520,  $P < 0.001$ ]. Age ( $\geq 50$  per 10 years,  $OR=1.7821$ , 95%  
14  
15  $CI=1.1102-2.851.44$ ,  $P=0.0203$ ), male sex ( $OR=2.4519$ , 95%  $CI=1.3739-3.3745$ ,  $P <$   
16  
17  $0.001$ ), and hyperuricemia ( $OR=1.6970$ , 95%  $CI=1.1814-2.6454$ ,  $P=0.02009$ ) were  
18  
19 also significantly associated with prehypertension. Furthermore, collinearity statistics  
20  
21 were  $>0.4$  for tolerance and  $<2.5$  for variance inflation factor, suggesting that  
22  
23 multicollinearity was not a concern among the independent variables.  
24  
25  
26  
27  
28  
29  
30

## 31 Discussion

32  
33 In this study, we found that prehypertension is highly prevalent in the Shunde  
34  
35 District, Guangdong Province. Prehypertensive individuals presented with other risk  
36  
37 factors associated with cardiovascular disease, such as overweight, dyslipidemia,  
38  
39 impaired glucose, and hyperuricemia. Furthermore, combined cardiovascular risk  
40  
41 factors were more significant in people with high-range prehypertension. To our  
42  
43 knowledge, this is the first study to show that there was a significant heterogeneity of  
44  
45 combined risk factors within the prehypertensive subgroups.  
46  
47  
48

49 Many epidemiological studies have demonstrated that prehypertension is an  
50  
51 important public health problem. However, the prevalence of prehypertension in  
52  
53 different countries and districts differs significantly, and may be influenced by  
54  
55  
56  
57  
58  
59  
60

1  
2  
3  
4  
5  
6  
7 different regional factors, such as climate and lifestyle, as well as ethnicity. At the  
8  
9 beginning of this century (2000–2001), a cross-sectional survey found that the  
10  
11 ~~prevalence~~ of prehypertension was 21.9% among Chinese subjects aged  
12  
13 between 35 and 74 years.<sup>3</sup> However, in other subsequent studies, the  
14  
15 ~~prevalence~~ of prehypertension was significantly higher than this ratio. In  
16  
17 rural northeastern China, the ~~prevalence~~ of prehypertension was 35.1% in  
18  
19 men and 32.5% in women,<sup>15</sup> and up to 40% in whole population from urban areas of  
20  
21 northeastern China, up to 40%,<sup>2,4,14,16</sup> which may be associated with the cold climate  
22  
23 and high-sodium diet. In this study, we found that the prevalence of prehypertension  
24  
25 in the Shunde District of Guangdong Province, a traditional but economically  
26  
27 developed district of southern China, was up to 38.6%. The ~~prevalence~~ was  
28  
29 very similar to the ~~prevalence of~~ in the urban areas of northeastern China~~northern~~  
30  
31 area,<sup>16</sup> and ~~it was~~ significantly higher than the ~~incidence~~~~prevalence~~ reported at the  
32  
33 beginning of this century for the entire country.<sup>3</sup> Further analysis showed that  
34  
35 increased BMI was the most important risk factor of prehypertension in our study.  
36  
37 Even among patients with low-range prehypertension, BMI was significantly  
38  
39 increased compared with the optimal BP group. Therefore, our study suggests that  
40  
41 although sodium intake is relatively low in Guangdong Province in southern China,<sup>15</sup>  
42  
43 the<sup>17</sup> the prevalence of prehypertension is almost as high as that in the northern area.  
44  
45  
46  
47  
48  
49 With the economic development and lifestyle changes, obesity/overweight has  
50  
51 become a very important risk factor for increased BP.

52  
53 Although the proportions of IFG and dyslipidemia were higher in prehypertension  
54  
55  
56  
57  
58  
59  
60

1  
2  
3  
4  
5  
6  
7 than optimal BP groups, in multivariable analysis, the associations of IFG and  
8  
9 dyslipidemia with prehypertension were not significant after adjustment for BMI.  
10  
11 Many studies have documented that overweight/obesity can cause significant insulin  
12  
13 resistance, which may play an important role in impaired glucose metabolism,  
14  
15 dyslipidemia, and increased BP.<sup>16,18, 17, 19</sup> Clinical studies have shown that weight  
16  
17 control can significantly lower BP.<sup>18, 20</sup> These results indicated that lifestyle  
18  
19 modifications, such as weight loss, are effective in the long-term primary prevention  
20  
21 of hypertension. With the economic development and lifestyle changes, lifestyle  
22  
23 modifications should be emphasized as a cornerstone in modern China.  
24  
25

26  
27 Added to traditional risk factors, previous studies have found that serum UA  
28  
29 levels were significantly associated with prehypertension.<sup>19,21, 20, 22</sup> The mechanisms  
30  
31 may be associated with inhibition of the nitric oxide pathway and activation of the  
32  
33 renin-angiotensin system. Further, UA can cause proliferation of vascular smooth  
34  
35 muscle cells and renal microvascular damage because of local inflammation and  
36  
37 oxidative stress, finally leading to high BP.<sup>21,23, 22, 24</sup> In our study, we found that the  
38  
39 level of UA tended to increase in the low-range prehypertension group ( $P = 0.07$ ), and  
40  
41 the difference was significant between high-range prehypertension and the optimal BP  
42  
43 groups. These results indicate that the effect of UA on BP may be increased  
44  
45 throughout the entire prehypertension range.  
46  
47  
48

49  
50 In a recent randomized controlled trial, prehypertensive obese adolescents aged  
51  
52 11–17 years were enrolled and randomized to urate-lowering therapy (including  
53  
54 allopurinol or probenecid) or placebo. Subjects treated with urate-lowering therapy  
55  
56  
57  
58  
59  
60

1  
2  
3  
4  
5  
6  
7 experienced a highly significant reduction in BP (SBP 10.2 mm Hg and DBP 9.0 mm  
8  
9 Hg, respectively). Systemic vascular resistance was also reduced in the urate-lowering  
10  
11 therapy group.<sup>23-25</sup> These findings strongly supported the synergistic pathogenic role  
12  
13 of ~~uric acid~~UA and obesity in hypertension. Genes and diet are important factors  
14  
15 affecting the levels of UA; therefore, we emphasize the importance of lifestyle  
16  
17 modification interventions for people with prehypertension.  
18  
19

20  
21 It was interesting that there was significant 'heterogeneity' of combined  
22  
23 cardiovascular risk factors within the prehypertensive subgroups in our study.  
24  
25 Compared with optimal BP, BMI and FPG were increased in the low-range  
26  
27 prehypertension group and were increased even further in the high-range  
28  
29 prehypertension group. Furthermore, the proportions of overweight, dyslipidemia, and  
30  
31 IFG were higher in the high-range prehypertension than those in the low-range  
32  
33 prehypertension groups. These findings confirmed the importance of the definition of  
34  
35 prehypertension, as well as the inhomogeneity of the prehypertension subcategories.  
36  
37

38 Our prior meta analysis also found that prehypertension was associated with increased  
39 risks of CVD<sup>26</sup> and end-stage renal disease.<sup>27</sup> However, because of limit prospective,  
40 randomized trials examining the effects of anti-hypertensive therapy on reducing  
41 target organ damage specifically in prehypertension, currently professional societies  
42 do not recommend pharmacotherapy for prehypertension, even in individuals with  
43 high-range prehypertension.<sup>28,29</sup> This is a great gap to be covered between  
44 epidemiological studies and randomized controlled studies in prehypertension.  
45  
46  
47  
48  
49  
50  
51  
52  
53 Prehypertensive individuals are at a high risk to progress to sustained hypertension, as  
54  
55  
56  
57  
58  
59  
60

1  
2  
3  
4  
5  
6 well as CVD and renal damage. So periodic screening is important. For therapeutic  
7 implications. Thus, we consider that healthcare professionals should recommend  
8  
9 lifestyle changes to subjects with prehypertension. Furthermore, high-risk  
10  
11 subpopulations with prehypertension, especially those with high-range  
12  
13 prehypertension should be selected for future controlled trials to evaluate the effects  
14  
15 of pharmacological treatment on this population.  
16  
17  
18

19  
20 Several limitations of this study must be considered. First, our data were based  
21  
22 on community-based health checkup information, and not from a multi-stage stratified  
23  
24 clustering sample. This may cause bias of the ~~incidence~~prevalence of prehypertension.  
25  
26 Second, some important confounding factors possibly associated with increased BP,  
27  
28 such as diet, physical activity, and socioeconomic factors, were not evaluated in the  
29  
30 present study. Third, follow up data of individuals with prehypertension were lack and  
31  
32 further studies were needed on the matter.  
33  
34  
35

### 36 37 Conclusion

38  
39 This study showed that companied with the economic development and lifestyle  
40  
41 changes, prehypertension is highly prevalent in the Shunde District, southern China.  
42  
43 Many other cardiovascular risk factors were presented in individuals with  
44  
45 prehypertension, especially in those with high-range prehypertension. Periodic  
46  
47 screening and lifestyle changes should be recommended to subjects with  
48  
49 prehypertension for prevention of hypertension, as well as cardiovascular disease.  
50  
51  
52  
53  
54  
55  
56  
57  
58  
59  
60

1  
2  
3  
4  
5  
6 **Contributors** YulH, YunH, and DX conceptualised the study, designed the protocol.  
7  
8 YulH, WQ and XC analysed the data and drafted the manuscript. CL, DZ, JH  
9  
10 collected the data. YW, YunH, and DX revised the manuscript. YunH and DX  
11  
12 participated in administrative and technical support.  
13

14 **Funding** This research received no specific grant from any funding agency in the  
15  
16 public, commercial or not-for-profit sectors.  
17

18 **Competing interests** None.  
19  
20  
21  
22  
23  
24  
25  
26  
27  
28  
29  
30  
31  
32  
33  
34  
35  
36  
37  
38  
39  
40  
41  
42  
43  
44  
45  
46  
47  
48  
49  
50  
51  
52  
53  
54  
55  
56  
57  
58  
59  
60

**References:**

1. Chobanian AV, Bakris GL, Black HR, *et al.* The Seventh Report of the Joint National Committee on Prevention, Detection, Evaluation, and Treatment of High Blood Pressure: the JNC 7 report. *JAMA* 2003; 289: 2560-72.
2. Sun Z, Zheng L, Xu C, *et al.* Prevalence of prehypertension, hypertension and, associated risk factors in Mongolian and Han Chinese populations in Northeast China. *Int J Cardiol* 2008; 128: 250-4.
3. Yu D, Huang J, Hu D, *et al.* Prevalence and risk factors of prehypertension among Chinese adults. *J Cardiovasc Pharmacol* 2008; 52: 363-8.
4. Sun Z, Zheng L, Wei Y, *et al.* Prevalence and risk factors of the rural adult people prehypertension status in Liaoning Province of China. *Circ J* 2007; 71: 550-3.
5. Liu LS [2010 Chinese guidelines for the management of hypertension]. *Zhonghua Xin Xue Guan Bing Za Zhi* 2011; 39: 579-615.
6. Elliott WJ, Black HR Prehypertension. *Nat Clin Pract Cardiovasc Med* 2007; 4: 538-48.
7. Egan BM, Lackland DT, Jones DW. Prehypertension: an opportunity for a new public health paradigm. *Cardiol Clin* 2010; 28: 561-9.
8. Pimenta E, Oparil S Prehypertension: epidemiology, consequences and treatment. *Nat Rev Nephrol* 2010; 6: 21-30.
9. Gupta P, Nagaraju SP, Gupta A, Mandya CK. Prehypertension - time to act. *Saudi J Kidney Dis Transpl* 2012; 23: 223-33.
10. [Expert Committee on the Diagnosis and Classification of Diabetes Mellitus.](#)

Report of the Expert Committee on the Diagnosis and Classification of Diabetes

Mellitus. *Diabetes Care* ~~2000~~2003; ~~26~~ *Suppl 1*: S5-S20.23-S4-19.

**11.** [Joint Committee for Developing Chinese guidelines on Prevention and Treatment of Dyslipidemia in Adults.](#) [Chinese guidelines on prevention and treatment of dyslipidemia in adults]. *Zhonghua Xin Xue Guan Bing Za Zhi* 2007; 35: 390-419.

**12.** Zhou B. [Predictive values of body mass index and waist circumference to risk factors of related diseases in Chinese adult population]. *Zhonghua Liu Xing Bing Xue Za Zhi* 2002; 23: 5-10.

**13.** Ma YC, Zuo L, Chen JH, *et al*: Modified glomerular filtration rate estimating equation for Chinese patients with chronic kidney disease. *J Am Soc Nephrol* 2006; 17: 2937-44.

**14.** [Pallant J. SPSS survival manual: a step by step guide to data analysis using SPSS for windows \(version 10\). Open University Press; 2001.](#)

**15.** [Li Z, Guo X, Zheng L, \*et al\*. Prehypertension in rural northeastern china: results from the northeast china rural cardiovascular health study. \*J Clin Hypertens \(Greenwich\)\* 2014;16:664-70.](#)

**146.** Dong GH, Wang D, Liu MM, *et al*. Sex difference of the prevalence and risk factors associated with prehypertension among urban Chinese adults from 33 communities of China: the CHPSNE study. *J Hypertens* 2012; 30: 485-91.

**157.** Cheng TO. Systolic and diastolic blood pressures and urinary sodium excretion in mainland China. *QJM* 2000; 93: 557-8.

**168.** Tobias DK, Pan A, Jackson CL, *et al*. Body-mass index and mortality among



adults with incident type 2 diabetes. *N Engl J Med* 2014; 370: 233-44.

**179.** Gillman MW, Ludwig DS. How early should obesity prevention start? *N Engl J Med* 2013; 369: 2173-5.

**1820.** Tyson CC, Appel LJ, Vollmer WM, *et al.* Impact of 5-year weight change on blood pressure: results from the Weight Loss Maintenance trial. *J Clin Hypertens.* 2013;15:458-64.

**1921.** Liang J, Xue Y, Zou C, Zhang T, Song H, Qi L. Serum uric acid and prehypertension among Chinese adults. *J Hypertens* 2009; 27: 1761-5.

**2022.** Kawamoto R, Tabara Y, Kohara K, Kusunoki T, Abe M, Miki T. Interaction between serum uric acid and triglycerides in relation to prehypertension in community-dwelling Japanese adults. *Clin Exp Hypertens* 2014; 36: 64-9.

**2123.** Soltani Z, Rasheed K, Kapusta DR, Reisin E. Potential role of uric acid in metabolic syndrome, hypertension, kidney injury, and cardiovascular diseases: is it time for reappraisal? *Curr Hypertens Rep* 2013; 15: 175-81.

**2224.** Reynolds TM. Serum uric acid and new-onset hypertension: a possible therapeutic avenue? *J Hum Hypertens* 2014;28:519-20.

**2325.** Soletsky B, Feig DI. Uric acid reduction rectifies prehypertension in obese adolescents. *Hypertension* 2012; 60: 1148-56.

**26.** Huang Y, Wang S, Cai X, *et al.*. Prehypertension and incidence of cardiovascular disease: a meta analysis. *BMC Med* 2013;11:177.

**27.** Huang Y, Cai X, Zhang J, *et al.*. Prehypertension and Incidence of ESRD: A Systematic Review and Meta analysis. *Am J Kidney Dis* 2014;63:76-83.

Formatted: French (France)

Formatted: French (France)

Formatted: Danish

1  
2  
3  
4  
5  
6  
7 [28. James P A, Oparil S, Carter B L, et al. 2014 Evidence-Based Guideline for the](#)  
8 [Management of High Blood Pressure in Adults: Report From the Panel Members](#)  
9 [Appointed to the Eighth Joint National Committee \(JNC 8\)\[J\]. \*JAMA\*](#)  
10 [2014.311:507-20.](#)

11  
12  
13  
14  
15 [29. Mancia G, Fagard R, Narkiewicz K, et al. 2013 ESH/ESC Guidelines for the](#)  
16 [management of arterial hypertension: The Task Force for the management of arterial](#)  
17 [hypertension of the European Society of Hypertension \(ESH\) and of the European](#)  
18 [Society of Cardiology \(ESC\)\[J\]. \*Eur Heart J\* 2013.34:2159-219.](#)  
19  
20  
21  
22  
23  
24  
25  
26  
27  
28  
29  
30  
31  
32  
33  
34  
35  
36  
37  
38  
39  
40  
41  
42  
43  
44  
45  
46  
47  
48  
49  
50  
51  
52  
53  
54  
55  
56  
57  
58  
59  
60

**Table 1 Prevalence of Prehypertension and Hypertension by Sex and Age Group**

| Age (years)   | n    | Optimal BP (%) | Prehypertension (%) | Hypertension (%) |
|---------------|------|----------------|---------------------|------------------|
| <b>Male</b>   |      |                |                     |                  |
| 35~49         | 970  | 48.1           | 34.4                | 17.4             |
| 50~64         | 996  | 27.1           | 48.0                | 24.9             |
| ≥ 65          | 708  | 20.6           | 49.6                | 29.8             |
| Total         | 2037 | 33.0           | 43.5                | 23.5             |
| <b>Female</b> |      |                |                     |                  |
| 35~49         | 758  | 59.8           | 26.5                | 12.9             |
| 50~64         | 797  | 42.3           | 36.3                | 22.2             |
| ≥ 65          | 482  | 35.1           | 34.4                | 30.5             |
| Total         | 2674 | 47.1           | 32.2                | 20.7             |
| <b>All</b>    |      |                |                     |                  |
| 35~49         | 1728 | 53.2           | 31.0                | 15.5             |
| 50~64         | 1793 | 33.9           | 42.8                | 23.7             |
| ≥ 65          | 1190 | 26.5           | 43.4                | 30.1             |
| Total         | 4711 | 39.1           | 38.6                | 22.3             |

BP: blood pressure

Table 2 Cardiovascular Risk Factors in Different Blood Pressure Statuses

|                                        | Optimal BP<br>(n=1842) | Prehypertension<br>(n=1819) | Hypertension<br>(n=1050) | <i>P</i> |
|----------------------------------------|------------------------|-----------------------------|--------------------------|----------|
| Age (years)                            | 48.8±10.5              | 52.1±11.3 <sup>△</sup>      | 54.3±10.4 <sup>△</sup>   | 0.008    |
| Male [n (%)]                           | 829 (45.0)             | 1163 (63.9) <sup>△</sup>    | 628 (59.8) <sup>△§</sup> | <0.001   |
| Smoking [n (%)]                        | 301 (16.3)             | 287 (15.8)                  | 186 (17.7)               | 0.77     |
| Alcoholic [n (%)]                      | 35 (1.9)               | 42 (2.3)                    | 27 (2.6)                 | 0.464    |
| Family history of Hypertension [n (%)] | 274 (14.9)             | 292 (16.1) <sup>△</sup>     | 203 (19.3) <sup>△§</sup> | 0.007    |
| Overweight [n (%)]                     | 236 (12.8)             | 395(21.7) <sup>△</sup>      | 241(23.0) <sup>△</sup>   | <0.001   |
| Obesity [n (%)]                        | 128(6.9)               | 156(8.6)                    | 98(9.3) <sup>△</sup>     | 0.019    |
| BMI (kg/m <sup>2</sup> )               | 21.6±3.2               | 24.9±3.5 <sup>△</sup>       | 25.6±4.8 <sup>△</sup>    | 0.001    |
| Dyslipidemia [n (%)]                   | 420(22.8)              | 488(26.8) <sup>△</sup>      | 312(29.7) <sup>△§</sup>  | <0.001   |
| TC (mmol/L)                            | 5.02±1.25              | 5.39±1.67 <sup>△</sup>      | 5.64±1.59 <sup>△§</sup>  | 0.01     |
| LDL-C (mmol/L)                         | 3.21±1.15              | 3.45±1.18                   | 3.68±1.32 <sup>△</sup>   | 0.03     |
| HDL-C (mmol/L)                         | 1.18±0.36              | 1.09±0.38                   | 1.02±0.41                | 0.75     |
| TG(mmol/L)                             | 1.66±0.42              | 2.07±0.58 <sup>△</sup>      | 2.09±0.63 <sup>△</sup>   | 0.001    |
| DM [n (%)]                             | 138(7.5)               | 168(9.2)                    | 109(10.4) <sup>△</sup>   | 0.002    |
| IFG [n (%)]                            | 261(14.2%)             | 384(21.1%) <sup>△</sup>     | 275(26.2) <sup>△§</sup>  | <0.001   |
| FPG (mmol/L)                           | 5.14±1.96              | 5.79±2.03 <sup>△</sup>      | 5.91±2.27 <sup>△</sup>   | 0.003    |
| Scr (mmol/L)                           | 72.2±19.7              | 75.0±25.1                   | 79.2±28.9                | 0.14     |
| BUN (mmol/L)                           | 5.34±1.71              | 6.01±1.87                   | 6.25±1.99                | 0.35     |
| eGFR (ml/min/1.73 m <sup>2</sup> )     | 126.8±27.9             | 125.2±29.4                  | 118.1±28.6               | 0.76     |
| Hyperuricemia [n (%)]                  | 233(12.6%)             | 302(16.6%) <sup>△</sup>     | 226(21.5) <sup>△§</sup>  | 0.001    |
| UA (mmol/L)                            | 377.5±32.2             | 402.9±34.6 <sup>△</sup>     | 428.1±33.8 <sup>△§</sup> | 0.007    |

BP, blood pressure; BMI, body mass index; TC, total cholesterol; LDL-C, low-density lipoprotein cholesterol;

HDL-C, high-density lipoprotein cholesterol; TG, triglycerides; IFG, impaired fasting glucose; Scr, serum

creatinine; BUN, blood urea nitrogen; eGFR, estimated glomerular filtration rate; UA, serum uric acid

△ vs. Optimal blood pressure *P* < 0.05, § vs. prehypertension *P* < 0.05

Table 3 Cardiovascular Risk Factors Different Sub-ranges of Prehypertension

|                                        | Low range prehypertension<br>(n=925) | High<br>range prehypertension (n=894) | <i>P</i> |
|----------------------------------------|--------------------------------------|---------------------------------------|----------|
| Age (years)                            | 50.6±11.2                            | 53.7±12.4 <sup>#</sup>                | 0.08     |
| Male [n (%)]                           | 584 (63.1%) <sup>#</sup>             | 579 (64.8%) <sup>#</sup>              | 0.47     |
| Smoking [n (%)]                        | 149 (16.1%)                          | 138 (15.4%)                           | 0.69     |
| Alcoholic [n (%)]                      | 20 (1.9%)                            | 22 (2.7%)                             | 0.29     |
| Family history of Hypertension [n (%)] | 153 (16.5%)                          | 139 (15.5%)                           | 0.56     |
| Overweight [n (%)]                     | 183 (19.8%) <sup>#</sup>             | 212 (23.7%) <sup>#</sup>              | 0.04     |
| Obesity [n (%)]                        | 75 (8.1%)                            | 81(9.1%) <sup>*</sup>                 | 0.47     |
| BMI (kg/m <sup>2</sup> )               | 23.7±3.3 <sup>*</sup>                | 26.1±3.9 <sup>#</sup>                 | <0.001   |
| Dyslipidemia [n (%)]                   | 227 (24.5%)                          | 261 (29.2%) <sup>#</sup>              | 0.025    |
| TC (mmol/L)                            | 5.25±1.38                            | 5.53±1.70 <sup>#</sup>                | 0.04     |
| LDL-C (mmol/L)                         | 3.33±1.08                            | 3.58±1.19 <sup>*</sup>                | 0.10     |
| HDL-C (mmol/L)                         | 1.14±0.35                            | 1.03±0.37                             | 0.69     |
| TG(mmol/L)                             | 1.81±0.56                            | 2.34±0.67 <sup>*</sup>                | 0.12     |
| DM [n (%)]                             | 78 (8.4%)                            | 90 (10.1%) <sup>*</sup>               | 0.23     |
| IFG [n (%)]                            | 171 (18.5%) <sup>#</sup>             | 213 (23.8%) <sup>#</sup>              | 0.005    |
| FPG (mmol/L)                           | 5.52±1.91 <sup>*</sup>               | 6.07±2.05 <sup>#</sup>                | 0.002    |
| Scr (mmol/L)                           | 76.1±29.4                            | 73.8±27.0                             | 0.18     |
| BUN (mmol/L)                           | 5.98±2.02                            | 6.04±1.79                             | 0.37     |
| eGFR (ml/min/1.73 m <sup>2</sup> )     | 128.7±30.6                           | 121.6±28.4                            | 0.29     |
| Hyperuricemia [n (%)]                  | 140 (15.1%)                          | 162 (18.1%) <sup>#</sup>              | 0.09     |
| UA (mmol/L)                            | 392.5±40.2                           | 411.8±37.9 <sup>#</sup>               | 0.08     |

BMI, body mass index; TC, total cholesterol; LDL-C, low-density lipoprotein cholesterol; HDL-C, high-density lipoprotein cholesterol; TG, triglycerides; IFG, impaired fasting glucose; Scr, serum creatinine; BUN, blood urea nitrogen; eGFR, estimated glomerular filtration rate; UA, serum uric acid

<sup>\*</sup> vs optimal blood pressure  $P < 0.05$ , <sup>#</sup> vs Optimal blood pressure  $P < 0.01$

Table 4 Multivariate Logistic Regression Analysis for Risk Factors of Prehypertension

| Risk Factors                                       | OR     | 95%CI          | P 值     |
|----------------------------------------------------|--------|----------------|---------|
| Age (per 10 years $\geq$ 50 years vs $<$ 50 years) | 1.7821 | 1.1102~21.8544 | 0.0203  |
| Sex (Men vs Women)                                 | 2.4519 | 1.3739~3.3745  | < 0.001 |
| Smoking (Yes vs No)                                | 0.97   | 0.7370~1.2934  | 0.8385  |
| Alcoholic (Yes vs No)                              | 1.0912 | 0.8289~1.4541  | 0.5533  |
| Family history of Hypertension (Yes vs No)         | 1.2429 | 0.9088~1.7189  | 0.19    |
| overweight/obesity (Yes vs No)                     | 2.8984 | 1.5655~5.3520  | < 0.001 |
| Dyslipidemia (Yes vs No)                           | 1.58   | 0.92~2.71      | 0.09    |
| Impaired glucose regulation (Yes vs No)            | 1.6364 | 0.96~2.7881    | 0.07    |
| Hyperuricemia (Yes vs No)                          | 1.6970 | 1.1814~2.6454  | 0.02009 |

Prehypertension was defined if individuals were not undergoing antihypertensive treatment and had a SBP of 120–139 mm Hg and/or DBP of 80–89 mm Hg. Individuals with optimal blood pressure (SBP < 120 mm Hg and DBP < 80 mm Hg) were used as reference.
